# Supplementary material for: Gender parity in scientific authorship in a National Institute for Health Research Biomedical Research Centre: a bibliometric analysis
Source: PubMed Central journal article supplement — BMJ Open. 2021 Mar 23;11(3):e037935. doi: 10.1136/bmjopen-2020-037935 (PMC7993305; doi:10.1136/bmjopen-2020-037935), 2021-03-23

# BMJ Open

BMJ Open is committed to open peer review. As part of this commitment we make the peer review history of every article we publish publicly available.

When an article is published we post the peer reviewers' comments and the authors' responses online. We also post the versions of the paper that were used during peer review. These are the versions that the peer review comments apply to.

The versions of the paper that follow are the versions that were submitted during the peer review process. They are not the versions of record or the final published versions. They should not be cited or distributed as the published version of this manuscript.

BMJ Open is an open access journal and the full, final, typeset and author-corrected version of record of the manuscript is available on our site with no access controls, subscription charges or pay-per-view fees (<http://bmjopen.bmj.com>).

If you have any questions on BMJ Open's open peer review process please email [info.bmjopen@bmj.com](mailto:info.bmjopen@bmj.com)

# BMJ Open

## A retrospective analysis of gender parity in scientific authorship in a biomedical research centre

|                               |                                                                                                                                                                                                                                                                                                                                                                                                                                                                                                                                                                                                                                                                                                                                                                                                                                                                                                                                                                                                           |
|-------------------------------|-----------------------------------------------------------------------------------------------------------------------------------------------------------------------------------------------------------------------------------------------------------------------------------------------------------------------------------------------------------------------------------------------------------------------------------------------------------------------------------------------------------------------------------------------------------------------------------------------------------------------------------------------------------------------------------------------------------------------------------------------------------------------------------------------------------------------------------------------------------------------------------------------------------------------------------------------------------------------------------------------------------|
| Journal:                      | <i>BMJ Open</i>                                                                                                                                                                                                                                                                                                                                                                                                                                                                                                                                                                                                                                                                                                                                                                                                                                                                                                                                                                                           |
| Manuscript ID                 | bmjopen-2020-037935                                                                                                                                                                                                                                                                                                                                                                                                                                                                                                                                                                                                                                                                                                                                                                                                                                                                                                                                                                                       |
| Article Type:                 | Original research                                                                                                                                                                                                                                                                                                                                                                                                                                                                                                                                                                                                                                                                                                                                                                                                                                                                                                                                                                                         |
| Date Submitted by the Author: | 21-Feb-2020                                                                                                                                                                                                                                                                                                                                                                                                                                                                                                                                                                                                                                                                                                                                                                                                                                                                                                                                                                                               |
| Complete List of Authors:     | Dam, Rinita; University of Oxford, Radcliffe Department of Medicine<br>Shah, Syed Ghulam Sarwar; Oxford University Hospitals NHS Foundation Trust, NIHR Oxford Biomedical Research Centre; University of Oxford, Radcliffe Department of Medicine<br>Milano, Maria; University of Oxford Medical Sciences Division, Radcliffe Department of Medicine<br>Edmunds, Laurel; University of Oxford Medical Sciences Division, Radcliffe Department of Medicine<br>Henderson, Lorna; Oxford University Hospitals NHS Foundation Trust, NIHR Oxford Biomedical Research Centre<br>Hartley, Catherine; Bodleian Health Care Libraries<br>Coxall, Owen; Bodleian Health Care Libraries<br>Ovseiko, Pavel; University of Oxford Medical Sciences Division, Radcliffe Department of Medicine<br>Buchan, Alastair; University of Oxford Medical Sciences Division, Radcliffe Department of Medicine<br>Kiparoglou, Vasiliki; Oxford University Hospitals NHS Foundation Trust, NIHR Oxford Biomedical Research Centre |
| Keywords:                     | BASIC SCIENCES, EDUCATION & TRAINING (see Medical Education & Training), Change management < HEALTH SERVICES ADMINISTRATION & MANAGEMENT, Health policy < HEALTH SERVICES ADMINISTRATION & MANAGEMENT, Organisational development < HEALTH SERVICES ADMINISTRATION & MANAGEMENT, STATISTICS & RESEARCH METHODS                                                                                                                                                                                                                                                                                                                                                                                                                                                                                                                                                                                                                                                                                            |
|                               |                                                                                                                                                                                                                                                                                                                                                                                                                                                                                                                                                                                                                                                                                                                                                                                                                                                                                                                                                                                                           |

SCHOLARONE™  
Manuscripts

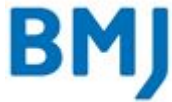

I, the Submitting Author has the right to grant and does grant on behalf of all authors of the Work (as defined in the below author licence), an exclusive licence and/or a non-exclusive licence for contributions from authors who are: i) UK Crown employees; ii) where BMJ has agreed a CC-BY licence shall apply, and/or iii) in accordance with the terms applicable for US Federal Government officers or employees acting as part of their official duties; on a worldwide, perpetual, irrevocable, royalty-free basis to BMJ Publishing Group Ltd ("BMJ") its licensees and where the relevant Journal is co-owned by BMJ to the co-owners of the Journal, to publish the Work in this journal and any other BMJ products and to exploit all rights, as set out in our [licence](#).

The Submitting Author accepts and understands that any supply made under these terms is made by BMJ to the Submitting Author unless you are acting as an employee on behalf of your employer or a postgraduate student of an affiliated institution which is paying any applicable article publishing charge ("APC") for Open Access articles. Where the Submitting Author wishes to make the Work available on an Open Access basis (and intends to pay the relevant APC), the terms of reuse of such Open Access shall be governed by a Creative Commons licence – details of these licences and which [Creative Commons](#) licence will apply to this Work are set out in our licence referred to above.

Other than as permitted in any relevant BMJ Author's Self Archiving Policies, I confirm this Work has not been accepted for publication elsewhere, is not being considered for publication elsewhere and does not duplicate material already published. I confirm all authors consent to publication of this Work and authorise the granting of this licence.

# 1 A retrospective analysis of gender parity in scientific authorship in a 2 biomedical research centre

3 Rinita Dam<sup>1\*</sup>, [rinita.dam@rdm.ox.ac.uk](mailto:rinita.dam@rdm.ox.ac.uk) \* Corresponding author

4 Syed Ghulam Sarwar Shah<sup>1,2\*</sup>, [Sarwar.Shah@ouh.nhs.uk](mailto:Sarwar.Shah@ouh.nhs.uk) \* Corresponding author

5 Maria Julia Milano<sup>1+</sup>, [colomilano@gmail.com](mailto:colomilano@gmail.com)

6 Laurel D Edmunds<sup>1</sup>, [laureledmunds@gmail.com](mailto:laureledmunds@gmail.com)

7 Lorna R Henderson<sup>1,2</sup>, [lorna.henderson@ouh.nhs.uk](mailto:lorna.henderson@ouh.nhs.uk)

8 Catherine R Hartley<sup>3</sup>, [Catherine.hartley@bodleian.ox.ac.uk](mailto:Catherine.hartley@bodleian.ox.ac.uk)

9 Owen Coxall<sup>3</sup>, [owen.coxall@bodleian.ox.ac.uk](mailto:owen.coxall@bodleian.ox.ac.uk)

10 Pavel V Ovseiko<sup>1</sup>, [pavel.ovseiko@rdm.ox.ac.uk](mailto:pavel.ovseiko@rdm.ox.ac.uk)

11 Alastair M Buchan<sup>1</sup>, [alastair.buchan@medsci.ox.ac.uk](mailto:alastair.buchan@medsci.ox.ac.uk)

12 Vasiliki Kiparoglou<sup>2,4</sup>, [vasiliki.kiparoglou@ouh.nhs.uk](mailto:vasiliki.kiparoglou@ouh.nhs.uk)

## 13 Author institutional addresses

14 <sup>1</sup> Radcliffe Department of Medicine. Medical Sciences Division, University of Oxford, Oxford, United  
15 Kingdom.

16 <sup>2</sup> National Institute for Health Research Oxford Biomedical Research Centre, Oxford University  
17 Hospitals NHS Foundation Trust, Oxford, United Kingdom.

18 <sup>3</sup> Bodleian Health Care Libraries, University of Oxford, Oxford, United Kingdom.

19 <sup>4</sup>Nuffield Department of Primary Health Care Sciences University of Oxford, Oxford.

20 +RD, SGSS and MJM contributed equally to this paper and are joint first authors on this work.

21 Word count: 4377 (excluding references)

## 22 ABSTRACT

23 **Objective:** Scientific authorship is a vital marker of success in academic careers and gender equity is  
24 a key performance metric in research. However, there is little understanding of gender equity in  
25 publications in biomedical research centres funded by the National Institute for Health Research  
26 (NIHR). This study assesses the gender parity in scientific authorship of biomedical research.

27  
28 **Design:** A retrospective descriptive study.

29 **Setting:** NIHR Oxford Biomedical Research Centre.

30 **Data:** 2409 publications accepted or published from 1 April 2012 to 31 March 2017.

31 **Main outcome measures:** Gender of authors, defined as a binary variable comprising either male or  
32 female categories, in six authorship categories: first author, joint first authors, first corresponding  
33 author, joint corresponding authors, last author and joint last authors.

34 **Results:** Publications comprised clinical research (39%, n=939), basic research (27%, n=643), and  
35 other types of research (34%, n=827). The proportion of female authors as first author (41%), first  
36 corresponding authors (34%) and last author (23%) was statistically significantly lower than male  
37 authors in these authorship categories. Of total joint first authors (n=458), joint corresponding  
38 authors (n=169), and joint last authors (n=229), female only authors comprised statistically  
39 significant smaller proportions i.e. 15% (n=69), 29% (n=49) and 10% (n=23) respectively, compared  
40 to male only authors in these joint authorship categories. There was a statistically significant  
41 association between gender of the last author(s) with gender of the first author(s) ( $\chi^2$  33.742,  $P <$   
42 0.001), corresponding author(s) ( $\chi^2$  540.774,  $P <$  0.001) and joint last author(s) ( $\chi^2$  91.291,  $P <$  0.001).

43 **Conclusions:** Although there are increasing trends of female authors as first authors (41%) and last  
44 authors (23%), female authors are underrepresented compared to male authors in all six categories  
45 of scientific authorship in biomedical research. Further research is needed to encourage gender  
46 parity in different categories of scientific authorship.

1  
2  
3 47 **Strengths and limitations of this study**  
4

- 5 48 • This is the first study to investigate gender parity in six categories of scientific authorship:  
6 49 first authors, first corresponding authors, last authors and three joint authorship categories  
7 50 i.e. joint first authors, joint corresponding authors and joint last authors in biomedical  
8 51 research.  
9  
10  
11 52 • This study provides an important benchmark on gender equity in scientific authorship for  
12 53 other NIHR funded centres and organisations in England.  
13  
14  
15 54 • The generalisability of the findings of this study may be limited due to differences in medical  
16 55 specialities, research areas, institutional cultures, and levels of support to individual  
17 56 researchers.  
18  
19  
20 57 • Using secondary sources for determining the gender of authors may have limitations, which  
21 58 could be avoided by seeking relevant information from original authors and institution  
22 59 affiliation at the time of submission.  
23  
24  
25

26 61 **Keywords:** Responsible Research and Innovation, Gender Equity, Scientific Authorship, National  
27 62 Institution for Health Research, Biomedical Research Centres, Evaluation, Translational Research  
28 63 Organisations, Translational Research, Basic Science Research.  
29  
30  
31  
32  
33  
34  
35  
36  
37  
38  
39  
40  
41  
42  
43  
44  
45  
46  
47  
48  
49  
50  
51  
52  
53  
54  
55  
56  
57  
58  
59  
60

## 64 INTRODUCTION

65 Promoting Responsible Research and Innovation (RRI) is a major strategy of the “Science with and  
66 for Society” work programme of the European Union’s (EU) Horizon 2020 Framework Programme  
67 for Research and Innovation[1]. RRI aims to build capacity and develop innovative ways to connect  
68 science to society[2]. The RRI approach enables all societal members (such as researchers, citizens,  
69 policymakers, businesses and third sector organisations) to work together during the research and  
70 innovation process in order to better align research and innovation with the values, needs and  
71 expectations of the society[1,2]. The RRI strategy includes the “keys” of public engagement, open  
72 access, gender, ethics and science education, and two further “keys”: sustainability and social  
73 justice, which have been added recently [3]. The idea is that by prioritising these key components of  
74 RRI, it would help make science more attractive to young people and society, and raise awareness of  
75 the meaning of responsible science[2].

76 We have focussed on the ‘gender’ element of the RRI because it is imperative to advance gender  
77 equality within research institutions, as well as within the design and content of research and  
78 innovation[1]. The issue of enhancing female participation in economic decision-making has become  
79 prominent in the national, European and international spheres, with a particular focus on the  
80 economic dimension of gender diversity[4]. In order to achieve a fair female participation within  
81 positions of power, it is recommended that women should hold half of the total seats in board  
82 rooms[5], however, a ratio between 40% and 60%, also known as a “gender balance zone”[6], is  
83 considered acceptable – a threshold that is set by the European Commission[4].

84 From the perspective of gender equality in academia and scientific research, gender parity in  
85 scientific authorship is an important measure of achievement. The term gender parity refers to “the  
86 equal contribution of women and men to different dimensions of life” and it is operationalised as a  
87 “relative equality in terms of numbers and proportions of women and men” for a particular  
88 indicator”[7]. Gender (dis)parity in scientific authorship has important implications for gender equity  
89 in academic advancement[8] because scientific authorship is commonly used as a measure of  
90 academic productivity that is used for performance management, reward, and recognition[9,10].  
91 The acceleration of women’s advancement and leadership in research is one of the stated objectives  
92 of the National Institute of Health Research (NIHR) in the United Kingdom (UK) and it is imperative  
93 for the RRI in the wider European research area. Yet, there is limited research concerning gender  
94 equity in scientific authorship of translational research funded through NIHR biomedical research  
95 centres (BRCs).

96 In the UK, women currently outnumber men in medical schools[11], however, a persistent gender  
97 disparity in scientific publications remains[10,12–23]. While the proportion of women as first and  
98 senior authors of original medical research has increased over the past few decades[24], women are  
99 still significantly underrepresented as authors of research articles in medical journals, especially as  
100 first and senior authors[14,22,23,25]. For example, in radiology the proportion of women as first  
101 author increased from 8% in 1978 to 32% in 2013 and senior author increased from 7% in 1978 to  
102 22% in 2013[23]. Similarly, in gastroenterology the proportion of women as first author increased  
103 from 9% in 1992 to 29% in 2012, and senior author increased from 5% in 1992 to 15% in 2012[14].

1  
2  
3 104 The profile of gender equity in higher education and research has been raised by the introduction of  
4 105 Athena SWAN-linked funding incentives by the NIHR[26–28]. While Athena SWAN awards are useful  
5 106 markers of achievement for higher education institutions and research institutes, they alone are  
6 107 insufficient to assess and monitor the progress of NIHR BRCs towards gender equity[29]. Currently,  
7 108 the proportion of women and the rate of their achievements are not tracked routinely by the NIHR  
8 109 BRCs and little is known about how much women contribute to scientific research and innovation in  
9 110 the BRCs. It is important to inform the acceleration of women’s advancement and leadership in  
10 111 translational research in line with the stated objectives of the NIHR within the UK and RRI within the  
11 112 wider European research area through the collection of gender-disaggregated bibliometric data and  
12 113 analysis of scientific authorship by gender.

13  
14  
15  
16  
17 114 For addressing the paucity of empirical research on women’s advancement and leadership in  
18 115 translational research in the UK and Europe, a recent study on gender equity in Neurology suggests  
19 116 the need for institutions to take a systematic approach to addressing gender disparities that involve  
20 117 customised, defined metrics and transparent reporting to stakeholders[30].

21  
22  
23 118 The aim of this study was to assess the gender parity in six types of scientific authorship in  
24 119 biomedical research.

## 25 26 120 **METHODS**

### 27 28 29 121 *Study design*

30 122 A retrospective descriptive study.

### 31 32 33 123 *Setting*

34 124 This study was conducted at the NIHR Oxford BRC, which is research collaboration between the  
35 125 Oxford University Hospitals NHS Foundation Trust and the University of Oxford[31]. The aim of NIHR  
36 126 BRCs is to support translational research and innovation to improve healthcare for patients[32].  
37 127 During the study period (April 2012-March 2017), the NIHR Oxford BRC was awarded £96m to  
38 128 support research across nine research themes, five cross-cutting themes, and a range of  
39 129 underpinning platforms. The research themes included Blood, Cancer, Cardiovascular, Dementia and  
40 130 Cerebrovascular Disease, Diabetes, Functional Neuroscience and Imaging, Infection, Translational  
41 131 Physiology, and Vaccines. The crosscutting themes included Genomic Medicine, Immunity and  
42 132 Inflammation, Surgical Innovation and Evaluation, Biomedical Informatics and Technology, and  
43 133 Prevention and Population Care. The major underpinning platforms included a Biorepository,  
44 134 Education and Training, Public Engagement, and Research Governance. It is a contractual  
45 135 requirement to report the number of BRC supported publications published by researchers funded  
46 136 or supported by the NIHR research funds on an annual basis. Additionally, the NIHR uses bibliometric  
47 137 analyses to inform eligibility for NIHR funding[33,34]. This study was carried out as part of a wider  
48 138 programme of research on the markers of achievement for assessing and monitoring gender equity  
49 139 in translational research organisations[29].



## 140 **Data**

141 Data comprised translational research publications published by researchers funded or supported by  
142 the NIHR Oxford BRC. The eligibility criteria for inclusion of a publication were funding or support by  
143 the NIHR Oxford BRC and publication between April 2012 and March 2017. Based on these criteria,  
144 2409 publications were identified. These publications were classified as: basic science studies,  
145 clinical studies (both trial and non-trial studies), and other studies (comments, editorials, systematic  
146 reviews, reviews, opinions, meeting reports, guidelines and protocols).

## 147 **Main outcome measures**

148 The main outcome measures were: (1) Gender of authors, defined as a binary variable comprising,  
149 either male or female categories, (2) Six categories of scientific authorship: first author, joint first  
150 authors, first corresponding author, joint corresponding authors, last author and joint last authors  
151 (Figure 1). These categories are conventionally associated with the highest amount of contribution,  
152 credit and prestige[10,17].

153 First author was defined as the first-named author of the publication. Publications that consisted of  
154 single authors were categorised as first authors. We considered the first author to be the main  
155 intellectual contributor in the publication, in terms of study design, data collection and analysis, and  
156 manuscript writing. Joint first authors were defined as two or more authors who were named as  
157 equal contributors and mentioned as joint first authors of the publication. The first corresponding  
158 author was defined as the only author who was reported as a corresponding author in the  
159 publication and his/her contact details such as an institutional address and/or an email address were  
160 provided for correspondence in the publication. Joint corresponding authors were defined as two or  
161 more authors who were listed or marked as corresponding authors and their contact details were  
162 provided for correspondence in the publication. Last author was defined as the last-named author of  
163 a publication. The last author was considered to be a group leader or principal investigator who may  
164 have provided significant intellectual contribution or supervision of the research work as well as  
165 acquisition of research funding[17,35]. Joint last authors were defined as two or more authors who  
166 were named as equal contributors in the publication and their names were mentioned as joint last  
167 authors in the publication. A major confounding factor, for which we could not control, was the  
168 informal nature of the conventions for the sequence and role of authors[35]. Although conventions  
169 for scientific authorship are well established in biomedical sciences[36,37], they may vary between  
170 different research areas and even between different research groups within the same area.

## 171 **Determination of gender of authors**

172 The gender of the authors was defined as a binary variable comprising either male or female  
173 categories, which were determined based on the first name of authors in all six categories of  
174 authorship included in the analysis. When the first names of authors were initialled in the  
175 publication or were difficult to associate with either male or female gender, further information was  
176 sought through searching their institutional webpages and online social network sites such as the  
177 LinkedIn and ResearchGate. We also used the Gender API (gender-api.com) when it was not possible  
178 to ascertain the gender of the authors by the above-mentioned sources. In addition, we contacted  
179 five authors directly via email to ascertain their gender. After completing data coding by two  
180 researchers (MJM and RD), to ensure the accuracy of data coding, 10% of the data were checked

181 independently (CH). Consensus was achieved through discussion between the researchers on data  
182 fields that did not match the assigning of the gender of authors and types of authorship (Figure 1).

### 183 **Statistical analysis**

184 Data were analysed using frequencies including counts and percentages. Chi-square tests were used  
185 for identifying statistically significant differences and associations between male and female authors  
186 in various categories of authorship. The level of significance was set at  $p < 0.05$ . Data were analysed  
187 using the IBM SPSS Statistics for Windows, Version 25.0 (Armonk, NY: IBM Corp.).

### 188 **Patient and public involvement statement**

189 There was no patient or public involvement in the study design.

## 190 **RESULTS**

### 191 **Type of research study**

192 Table 1 presents an overview of the types of research studies by year. Clinical research studies (both  
193 trial and non-trial studies) comprised 39% (n=939), basic science research 27% (n=643) and a third of  
194 publications (34%, n=827) included other types of research, such as systematic reviews, reviews,  
195 research protocols, editorials, guidelines, opinions, comments, and meeting reports.

196 **Table 1** Number of publications by year of acceptance and types of research studies

| Year<br>(Accepted) | Types of research studies<br>Count (%) |                   |                                 |                   | Total Count<br>(%) |
|--------------------|----------------------------------------|-------------------|---------------------------------|-------------------|--------------------|
|                    | Basic<br>science                       | Clinical<br>trial | Clinical study -<br>Not a trial | Other*            |                    |
| 2012†              | 75 (27.6)                              | 18 (6.6)          | 90 (33.1)                       | 89 (32.7)         | 272 (100)          |
| 2013◊              | 151 (28.2)                             | 27 (5.0)          | 183 (34.2)                      | 174 (32.5)        | 535 (100)          |
| 2014◊              | 122 (22.2)                             | 29 (5.3)          | 204 (37.2)                      | 194 (35.3)        | 549 (100)          |
| 2015◊              | 137 (24.7)                             | 48 (8.7)          | 158 (28.5)                      | 211 (38.1)        | 554 (100)          |
| 2016◊              | 137 (31.8)                             | 31 (7.2)          | 120 (27.8)                      | 143 (33.2)        | 431 (100)          |
| 2017‡              | 21 (30.9)                              | 5 (7.4)           | 26 (38.2)                       | 16 (23.5)         | 68 (100)           |
| <b>Total</b>       | <b>643 (26.7)</b>                      | <b>158 (6.6)</b>  | <b>781 (32.4)</b>               | <b>827 (34.3)</b> | <b>2409 (100)</b>  |

197 †April-December, ◊January-December ‡January-March, \*systematic reviews, reviews, research  
198 protocols, editorials, guidelines, opinions, comments, and meeting reports

### 199 **Authorship type and Gender**

200 Table 2 presents an overview of gender of authors by types of authorship. This highlights that male  
201 authors were statistically significant more likely to be first authors (59%,  $\chi^2$  972.938,  $P < 0.001$ ), first  
202 corresponding authors (66%,  $\chi^2$  242.970,  $P < 0.001$ ) and last authors (77%,  $\chi^2$  702.411,  $P < 0.001$ )  
203 (Table 2). Furthermore, analyses of joint authorship categories revealed that the proportion of  
204 'female only' authors was statistically significantly lower than 'male only' authors in the joint  
205 corresponding authors (29%,  $\chi^2$  79.858,  $P < 0.001$ ) and joint last authors categories (10%,  $\chi^2$  56.550,

206 P<0.001) (Table 2). However, in the joint first authors category, the proportion of 'male and female'  
 207 as joint first authors (57%,  $\chi^2$  128.467, P <0.001) was statistically significantly higher than male only  
 208 and female only first authors (Table 2).

209 **Table 2.** Authorship categories and gender of authors

| Authorship type                        | Gender of authors |             |                 | Chi-Square Test<br>$\chi^2$ (p) |
|----------------------------------------|-------------------|-------------|-----------------|---------------------------------|
|                                        | Count (%)         |             |                 |                                 |
| Number of publications in the category | Male only         | Female only | Male and female |                                 |
| First author (n=2407)                  | 1413 (58.7)       | 994 (41.3)  | N/A*            | 72.938 (<0.001)                 |
| First corresponding author (n=2371)    | 1565 (66)         | 806 (34)    | N/A             | 242.970 (<0.001)                |
| Last author (n=2406)                   | 1853 (77)         | 553 (23)    | N/A             | 702.411 (<0.001)                |
| Joint first authors (n=458)            | 127 (27.7)        | 69 (15.1)   | 262 (57.2)      | 128.467 (<0.001)                |
| Joint corresponding authors (n=169)    | 107 (63.3)        | 49 (29)     | 13 (7.7)        | 79.858 (<0.001)                 |
| Joint last authors (n=229)             | 108 (47.2)        | 23 (10)     | 98 (42.8)       | 56.550 (<0.001)                 |

\*N/A= not applicable.

### 210 ***Gender of authors by type of research studies***

211 Analysis of gender of authors by types of research studies (i.e. basic science, clinical trials, non-trial  
 212 clinical studies and other research) showed that the proportions of male only authors were  
 213 statistically significantly higher than the proportions of female only authors in three authorship  
 214 categories: first authors ( $\chi^2$  8.606 (df 3), P = 0.035), first corresponding authors ( $\chi^2$  36.955 (df 9), P <  
 215 0.001) and last authors ( $\chi^2$  10.314 (df 3), P= 0.016). The analysis by type of research studies also  
 216 revealed that there were no significant differences between the proportions of male only and  
 217 female only authors in all three joint authorship categories: joint first authors ( $\chi^2$  5.549 (df 6), P =  
 218 0.476), joint corresponding authors ( $\chi^2$  9.021 (df 6), P = 0 .172) and joint last authors ( $\chi^2$  8.433 (df 6),  
 219 P = 0 .208).

### 220 ***Yearly trends in Authorship by gender***

221 Figure 2 presents the yearly trends in scientific authorship by gender. In all authorship types and  
 222 across all five years of publication, the proportion of male and female authors varied (Figure 2). The  
 223 analysis showed women were significantly underrepresented across all years and authorship types.  
 224 Interestingly, joint first authorship indicated a higher proportion of 'male and female' authors  
 225 compared to 'male only' and 'female only' authors (Figure 2).

### 226 ***Association between same gender across authorship categories***

227 There was a statistically significant association between the same gender in first authorship and  
228 corresponding authorship categories ( $\chi^2$  775.425 (df 3),  $P < 0.001$ ) and the first author and joint first  
229 authors ( $\chi^2$  138.849 (df 2),  $P < 0.001$ ).

230 Furthermore, there were statistically significant associations between the same gender in the last  
231 author category with the same gender of first author(s) ( $\chi^2$  33.742 (df 2),  $P < 0.001$ ), corresponding  
232 author(s) ( $\chi^2$  540.774 (df 1),  $P < 0.001$ ) and joint last authors ( $\chi^2$  91.291 (df 2),  $P < 0.001$ ). However,  
233 there was no statistically significant association between the male and female last authors with the  
234 respective gender of joint first authors ( $\chi^2$  4.29 (df 2),  $P = 0.117$ ).

## 235 **DISCUSSION**

236 We retrospectively analysed the gender parity of authors in six categories of authorship of scientific  
237 publications that were published over a five-year period. Our analysis shows that the number of  
238 female authors were underrepresented across all six categories of authorship [10,38,39].

239 In the first author category the proportions of female authors and male authors were within the  
240 40%-60% "gender balance zone"[6]. The greatest gender imbalance was observed in the last author  
241 category where 'female only' authors comprised only 23%. Nonetheless, this proportion is higher  
242 than other studies reporting similar analyses[11,16,24].

243 To the best of our knowledge, this study presents the first analysis of joint authorship in three  
244 categories. Secondly, it demonstrates underrepresentation in female only authors in six categories of  
245 scientific authorship[40]. Thirdly, the analysis highlights gender inequity with female  
246 underrepresentation in prestigious authorship positions compared to male in biomedical research.  
247 This is consistent with other fields including: epilepsy, lung cancer, dermatology, eating disorders  
248 and in medicine in general[17,19,41–43].

249 This study extends understanding of gender-based trends in scientific authorship (Figure2) by  
250 showing encouraging incremental changes in gender parity in authorship in a biomedical research  
251 setting. Previous research examined the gender gap in authorship within the medical literature  
252 reporting an upward trend for female first authors from 6% in 1970 to 29% in 2004 and female last  
253 authors from 4% in 1970 to 19% 2004. However, it was limited to US based institutions[12]. A similar  
254 UK based study covering the same period (i.e. 1970-2004) also showed upward trends for female  
255 first authors increasing from 11% in 1970 to 37% in 2004 and female last authors from 12% in 1970  
256 to 17% in 2004[24]. In addition, a recent study by Filardo et al.[16] examined the prevalence of  
257 female first authorship of original research published in six high impact general medical journals  
258 between February 1994 and June 2014 revealed that the adjusted probability of an article having a  
259 female first authorship increased significantly from 27% in 1994 to 37% in 2014[16]. However,  
260 despite the proportion of female first authors varied greatly by journal, men were generally more  
261 likely to be first authors than women[16]. Compared to previous studies mentioned above, our study  
262 provides evidence of higher and increasing gender equity in the first authors, last authors and other  
263 four categories of scientific authorship in biomedical research (Table 2).

Our study identified a strong association between same gender and authorship types showing if the first author of a publication was male, it was highly likely that the first corresponding author of the same publication would also be male. Similarly, the likelihood of the first author being female was higher, if the first corresponding author was also female[44]. Likewise, there appeared to be a significant association of male and female last authors with the respective gender of first authors. Previous research has highlighted males and females were more likely to be first authors on papers if the last authors were of the same gender; however, these were not conducted in a translational research setting[23,45–47]. There was also a strong association of male and female last authors with the respective gender of corresponding authors[44].

However, due to the differences in gender equity between different research areas and medical specialties, where a centre-specific mix of research themes is likely to influence gender equity in scientific authorship, it is difficult to make direct comparisons across the literature.

Overall, our results build an important evidence base in biomedical research settings concerning gender parity and support the findings from previous studies where analysis of scientific authorship by gender has been used as an important marker of gender equity[12,24,48–50].

### ***Implications for policy and practice***

While NIHR BRCs routinely collect bibliometric data on publications arising from the NIHR-funded research, and report to the NIHR (the funder), to the best of our knowledge, this data is not routinely analysed by gender. Our study supports the feasibility of using NIHR BRCs funded or supported research publications for analysing scientific authorship by gender. While retrospective analysis of the gender of authors in scientific publications is labour-intensive and has limitations, there is an opportunity to begin to track this prospectively. As more data becomes available, this would enable longitudinal analysis of scientific authorship by gender, which could be useful for tracking progress towards gender equity and related issues such as markers of achievement across all NIHR BRCs.

In addition, since the acceleration of women's advancement and leadership in translational research is one of the stated objectives of the NIHR, investigating the extent of gender equity in scientific authorship may usefully inform strategies to accelerate women's advancement and leadership in NIHR-funded research. Moreover, bibliometric analyses used by the NIHR to inform competition for NIHR funding may incorporate the gender dimension into the analysis, which could provide additional information on the competitiveness for NIHR funding[51,52].

## **CONCLUSION**

Our results show that while first authorship is within the 40%-60% gender balance zone, a greater gender disparity is prevalent in other types of scientific authorship in biomedical research. The proportion of female authors is significantly lower than the proportion of male authors in all six categories of authorship included in our analysis. This study also demonstrates the feasibility of analysing scientific authorship by gender, which could provide useful insight about gender equity in scientific publications, which may be a useful marker of achievement. Overall, our study demonstrates that it is feasible to analyse the available bibliometric data on publications arising

1  
2  
3 303 from NIHR funding by gender and consider establishing processes for analysing gender equity in  
4 304 scientific authorship over time.

## 305 **Contributors**

306 LDE conceived the study. RD and MJM coded the data. SGSS analysed the data. RD and SGSS drafted  
307 the manuscript. PVO contributed to the conception of the study and co-wrote parts of the  
308 manuscript. CRH and OC participated in data collection. VK, LRH, and AMB contributed to the  
309 conception of the study, facilitated access to the publications and coordinated the study. All authors  
310 read, contributed to and approved the final manuscript.

## 311 **Funding**

312 This study is funded by the European Union's Horizon 2020 research and innovation programme  
313 award STARBIOS2 under grant agreement No. 709517 and by the National Institute for Health  
314 Research (NIHR) Oxford Biomedical Research Centre, grant BRC-1215-20008 to the Oxford University  
315 Hospitals NHS Foundation Trust and the University of Oxford. The views expressed are those of the  
316 authors and not necessarily those of the NHS, the NIHR, or the Department of Health and Social  
317 Care.

## 318 **Competing interests**

319 VK is Chief Operating Officer and LRH is Clinical Research Manager at the National Institute for  
320 Health Research (NIHR) Biomedical Research Centre, Oxford. AMB is a senior medical science advisor  
321 and co-founder of Brainomix, a company that develops electronic ASPECTS (e-ASPECTS), an  
322 automated method to evaluate ASPECTS in stroke patients. MJM, LDE and PVO were funded by  
323 STARBIOS2 and the National Institute for Health Research (NIHR) Oxford Biomedical Research Centre  
324 (BRC). PVO is a member of the NIHR Advisory Group on Equality, Diversity, and Inclusion, a member  
325 of the European Association of Science Editors Gender Policy Committee, and a member of the  
326 Athena SWAN Self-Assessment Team of the Radcliffe Department of Medicine, University of Oxford.  
327 The other authors declare no competing interests.

## 328 **Ethics**

329 The University of Oxford Clinical Trials and Research Governance Team reviewed the study and  
330 deemed it exempt from full ethics review on the grounds that it falls outside of the Governance  
331 Arrangements for Research Ethics Committees (GAfREC), which stipulate which research studies are  
332 required to have ethics review. A wider programme of research on the activities of the NIHR Oxford  
333 Biomedical Research Centre from 2017 to 2022 received ethics clearance through the University of  
334 Oxford Central University Research Ethics Committee (R51801/ RE001), the Health Research  
335 Authority (IRAS ID 228049) and the Oxford University Hospitals NHS Foundation Trust Management  
336 (PID 12779).

## 337 **Acknowledgements**

338 The authors wish to thank Professor Helen McShane for reviewing the draft manuscript and making  
339 comments and suggestions for improving it.

1  
2  
3  
4 340 **Patient consent for publication**

5 341 Not required.

7  
8 342 **Data sharing statement**

9  
10 343 No additional data available.

11  
12 344 **REFERENCES**

- 13  
14  
15 345 1 Colizzi V, Mezzana D, Ovseiko P V., *et al.* Structural transformation to attain responsible  
16 346 BIOSciences (STARBIOS2): Protocol for a horizon 2020 funded European multicenter project  
17 347 to promote responsible research and innovation. *J Med Internet Res* 2019;**21**.  
18 348 doi:10.2196/11745
- 19  
20 349 2 Elster D, Barendziak T, Birkholz J. Towards a Sustainable and Open Science:  
21 350 Recommendations for Enhancing Responsible Research and Innovation in the Biosciences at  
22 351 the University of Bremen. 2019. <http://elib.suub.uni-bremen.de/edocs/00107721-1.pdf>
- 23  
24 352 3 European Commission. Indicators for promoting and monitoring Responsible Research and  
25 353 Innovation. Report from the Expert Group on Policy Indicators for Responsible Research and  
26 354 Innovation. 2015.
- 27  
28 355 4 European Commission. DIRECTIVE OF THE EUROPEAN PARLIAMENT AND OF THE COUNCIL on  
29 356 improving the gender balance among non-executive directors of companies listed on stock  
30 357 exchanges and related measures. Published Online First: 2012.[http://eur-](http://eur-lex.europa.eu/LexUriServ/LexUriServ.do?uri=COM:2012:0614:FIN:en:PDF)  
31 358 [lex.europa.eu/LexUriServ/LexUriServ.do?uri=COM:2012:0614:FIN:en:PDF](http://eur-lex.europa.eu/LexUriServ/LexUriServ.do?uri=COM:2012:0614:FIN:en:PDF)
- 32  
33 359 5 European Commission. Report on Equality between Women and Men in the European Union.  
34 360 2019;:1–78. doi:10.2838/776419
- 35  
36 361 6 Kuhlmann E, Ovseiko P V., Kurmeyer C, *et al.* Closing the gender leadership gap: A multi-  
37 362 centre cross-country comparison of women in management and leadership in academic  
38 363 health centres in the European Union. *Hum Resour Health* 2017;**15**:1–7. doi:10.1186/s12960-  
39 364 016-0175-y
- 40  
41 365 7 European Institute for Gender Equality. Gender parity.  
42 366 2020.<https://eige.europa.eu/thesaurus/terms/1195> (accessed 19 Feb 2020).
- 43  
44 367 8 Rexrode KM. The gender gap in first authorship of research papers. *BMJ* 2016;**1130**:1–2.  
45 368 doi:10.1136/bmj.i1130
- 46  
47 369 9 Bloch C, Graversen EK, Pedersen HS. Competitive Research Grants and Their Impact on Career  
48 370 Performance. *Minerva* 2014;**52**:77–96.
- 49  
50 371 10 Bendels, M, Muller, R, Brueggmann, D, Groneberg D. Gender disparities in high-quality  
51 372 research revealed by Nature Index journals. *PLoS One* 2018;**13**:1–21.
- 52  
53 373 11 Jefferson L, Bloor K, Maynard A. Women in medicine: Historical perspectives and recent  
54 374 trends. *Br Med Bull* 2015;**114**:5–15. doi:10.1093/bmb/ldv007
- 55  
56 375 12 Jagsi, R, Guancial, E, Worobey, C, Henault, L, Chang, Y, Starr, R, Tarbell, N, Hylek E. The  
57 376 “Gender Gap” in Authorship of Academic Medical Literature — A 35-Year Perspective. *N Engl*

- 1  
2  
3 377 *J Med* 2006;**355**:281–7.  
4
- 5 378 13 Mueller CM, Gaudilliere DK, Kin C, *et al.* Gender disparities in scholarly productivity of US  
6 379 academic surgeons. *J Surg Res* 2016;**203**:28–33. doi:10.1016/j.jss.2016.03.060  
7
- 8 380 14 Long MT, Leszczynski A, Thompson KD, *et al.* Female authorship in major academic  
9 381 gastroenterology journals: A look over 20 years. *Gastrointest Endosc* 2015;**81**:1440-1447.e3.  
10 382 doi:10.1016/j.gie.2015.01.032  
11
- 12 383 15 Fishman M, Williams WA, Goodman DM, *et al.* Gender Differences in the Authorship of  
13 384 Original Research in Pediatric Journals, 2001-2016. *J Pediatr* 2017;**191**:244-249.e1.  
14 385 doi:10.1016/j.jpeds.2017.08.044  
15
- 16 386 16 Filardo G, Graca B, Sass DM, *et al.* Trends and comparison of female first authorship in high  
17 387 impact medical journals : observational study ( 1994-2014 ). *BMJ* 2016;**352**:1–8.  
18 388 doi:10.1136/bmj.i847  
19
- 20 389 17 Bendels, Michael, Wanke, Eileen, Schoffel, Norman, Bauer, J, Quarcoo, David and Groneberg  
21 390 D. Gender equality in academic research on epilepsy — a study on scientific authorships.  
22 391 *Epilepsia* 2017;**58**:1794–802. doi:10.1111/epi.13873  
23
- 24 392 18 Bendels MHK, Brüggmann D, Schöffel N, *et al.* Gendermetrics of cancer research : results  
25 393 from a global analysis on lung cancer. *Oncotarget* 2017;:1–11.  
26
- 27 394 19 Bendels MHK, Dietz MC, Brüggmann D, *et al.* Gender disparities in high-quality dermatology  
28 395 research : a descriptive bibliometric study on scientific authorships. *BMJ Open* 2018;**8**:1–11.  
29 396 doi:10.1136/bmjopen-2017-020089  
30
- 31 397 20 Bendels MHKK, Brüggmann D, Schöffel N, *et al.* Gendermetrics of cancer research: Results  
32 398 from a global analysis on prostate cancer. *Oncotarget* 2018;**9**:19640–9.  
33 399 doi:10.18632/oncotarget.24716  
34
- 35 400 21 Sing DC, Jain D, Ouyang D. Gender trends in authorship of spine-related academic literature  
36 401 — a 39-year perspective. *Spine J* 2017;**17**:1749–54. doi:10.1016/j.spinee.2017.06.041  
37
- 38 402 22 Schisterman EF, Swanson CW, Lu Y, *et al.* The changing face of epidemiology: gender  
39 403 disparities in citations? *Epidemiology* 2017;**28**:159–68.  
40 404 doi:10.1097/EDE.0000000000000593.The  
41
- 42 405 23 Piper CL, Scheel JR, Lee CI, *et al.* Gender trends in radiology authorship: A 35-year analysis.  
43 406 *Am J Roentgenol* 2016;**206**:3–7. doi:10.2214/AJR.15.15116  
44
- 45 407 24 Sidhu R, Rajashekhar P, Lavin VL, *et al.* The gender imbalance in academic medicine: A study  
46 408 of female authorship in the United Kingdom. *J R Soc Med* 2009;**102**:337–42.  
47 409 doi:10.1258/jrsm.2009.080378  
48
- 49 410 25 Sing DC, Jain D, Ouyang D. Gender trends in authorship of spine-related academic literature—  
50 411 a 39-year perspective. *Spine J* 2017;**17**:1749–54. doi:10.1016/j.spinee.2017.06.041  
51
- 52 412 26 Ovseiko P V., Chapple A, Edmunds LD, *et al.* Advancing gender equality through the Athena  
53 413 SWAN Charter for Women in Science: An exploratory study of women’s and men’s  
54 414 perceptions. *Heal Res Policy Syst* 2017;**15**:1–13. doi:10.1186/s12961-017-0177-9  
55
- 56 415 27 Ovseiko P V., Pololi LH, Edmunds LD, *et al.* Creating a more supportive and inclusive university  
57  
58  
59  
60



- 1  
2  
3 416 culture: a mixed-methods interdisciplinary comparative analysis of medical and social  
4 417 sciences at the University of Oxford. *Interdiscip Sci Rev* 2019;**44**:166–91.  
5 418 doi:10.1080/03080188.2019.1603880  
6  
7 419 28 Schmidt EK, Ovseiko P V, Henderson LR, *et al*. Understanding the Athena SWAN award  
8 420 scheme for gender equality as a complex social intervention in a complex system: analysis of  
9 421 Silver award action plans in a comparative European perspective. *bioRxiv* 2019;:555482.  
10 422 doi:10.1101/555482  
11  
12 423 29 Ovseiko, PV, Edmunds, LD, Pololi, LH *et al*. Markers of achievement for assessing and  
13 424 monitoring gender equity in translational research organisations : a rationale and study  
14 425 protocol. *BMJ Open* 2016;**6**:1–11. doi:10.1136/bmjopen-2015-009022  
15  
16 426 30 Silver JK. Understanding and addressing gender equity for women in neurology. *Neurology*  
17 427 2019;**93**:538–49. doi:10.1212/WNL.0000000000008022  
18  
19 428 31 NIHR Oxford BRC. About the NIHR Oxford Biomedical Research Centre.  
20 429 2019.<https://oxfordbrc.nihr.ac.uk/about-us-intro/> (accessed 19 Dec 2019).  
21  
22 430 32 Greenhalgh T, Ovseiko P V., Fahy N, *et al*. Maximising value from a United Kingdom  
23 431 Biomedical Research Centre: study protocol. *Heal Res policy Syst* 2017;**15**:70.  
24 432 doi:10.1186/s12961-017-0237-1  
25  
26 433 33 Gunashekar S, Parks S, Calero-Medina C, *et al*. Bilbliometric analysis of highly cited  
27 434 publications of biomedical and health research in England, 2004--2013. *Bibliometric Anal*  
28 435 *highly cited Publ Biomed Heal Res England, 2004--2013* 2016;:83.  
29 436 doi:<https://doi.org/10.7249/RR1363>  
30  
31 437 34 Gunashekar S, Wooding S, Guthrie S. How do NIHR peer review panels use bibliometric  
32 438 information to support their decisions? *Scientometrics* 2017;**112**:1813–35.  
33 439 doi:10.1007/s11192-017-2417-8  
34  
35 440 35 Tschardt T, Hochberg ME, Rand TA, *et al*. Author sequence and credit for contributions in  
36 441 multiauthored publications. *PLoS Biol* 2007;**5**:0013–4. doi:10.1371/journal.pbio.0050018  
37  
38 442 36 Wren JD, Kozak KZ, Johnson KR, *et al*. The write position. A survey of perceived contributions  
39 443 to papers based on byline position and number of authors. *EMBO Rep* 2007;**8**:988–91.  
40 444 doi:10.1038/sj.embor.7401095  
41  
42 445 37 ICMJE. Defining the Role of Authors and Contributors.  
43 446 2019.[http://www.icmje.org/recommendations/browse/roles-and-responsibilities/defining-](http://www.icmje.org/recommendations/browse/roles-and-responsibilities/defining-the-role-of-authors-and-contributors.html)  
44 447 [the-role-of-authors-and-contributors.html](http://www.icmje.org/recommendations/browse/roles-and-responsibilities/defining-the-role-of-authors-and-contributors.html) (accessed 23 Dec 2019).  
45  
46 448 38 Holman L, Stuart-fox D, Hauser CE. The gender gap in science: How long until women are  
47 449 equally represented? *PLoS Biol* 2018;**16**:1–20. doi:10.1371/journal.pbio.2004956  
48  
49 450 39 UNESCO. Women in Science. Fact Sheet. 2018.  
50  
51 451 40 Broderick NA, Casadevall A. Gender inequalities among authors who contributed equally.  
52 452 *Elife* 2019;**8**:1–11. doi:10.7554/eLife.36399  
53  
54 453 41 Bendels MHK, Bruggmann D SN *et al*. Gendermetrics of cancer research: results from a global  
55 454 analysis on lung cancer. *Oncotarget* 2017;:1–11.  
56  
57  
58  
59  
60

- 1  
2  
3 455 42 Strand M, Bulik CM. Trends in female authorship in research papers on eating disorders: 20-  
4 456 year bibliometric study. *BJPsych Open* 2018;**4**:39–46. doi:10.1192/bjo.2017.8
- 6 457 43 Gayet-Ageron A, Poncet A, Perneger T. Comparison of the contributions of female and male  
7 458 authors to medical research in 2000 and 2015: A cross-sectional study. *BMJ Open* 2019;**9**:1–8.  
8 459 doi:10.1136/bmjopen-2018-024436
- 10 460 44 Ouyang, D, Harrington, RA., Rodriguez F. Association Between Female Corresponding Authors  
11 461 and Female Co-Authors in Top Contemporary Cardiovascular Medicine Journals. *Circ Am Hear*  
12 462 *Assoc* 2019;**139**:1127–9. doi:10.1161/CIRCULATIONAHA.118.037763
- 14 463 45 Fox CW, Burns CS, Muncy AD, *et al.* Gender differences in patterns of authorship do not affect  
15 464 peer review outcomes at an ecology journal. *Funct Ecol* 2016;**30**:126–39. doi:10.1111/1365-  
16 465 2435.12587
- 18 466 46 Salerno PE, Páez-Vacas M, Guayasamin JM, *et al.* Male principal investigators (almost) don't  
19 467 publish with women in ecology and zoology. *PLoS One* 2019;**14**:1–14.  
20 468 doi:10.1371/journal.pone.0218598
- 22 469 47 Edwards HA, Schroeder J, Dugdale HL. Correction: Gender differences in authorships are not  
23 470 associated with publication bias in an evolutionary journal(PLoS ONE (2019)13:8  
24 471 (e0201725)Doi:10.1371/journal.pone.0201725). *PLoS One* 2019;**14**:1–16.  
25 472 doi:10.1371/journal.pone.0217251
- 27 473 48 Bendels MHK, Müller R, Brueggmann D, *et al.* Gender disparities in high-quality research  
28 474 revealed by nature index journals. *PLoS One* 2018;**13**:1–21.  
29 475 doi:10.1371/journal.pone.0189136
- 31 476 49 Feramisco JD, Leitenberger JJ, Redfern SI, *et al.* A gender gap in the dermatology literature ?  
32 477 Cross-sectional analysis of manuscript authorship trends in dermatology journals during 3  
33 478 decades. *J Am Dermatology* 2009;**60**:63–9. doi:10.1016/j.jaad.2008.06.044
- 35 479 50 Bhattacharyya N, Shapiro NL. Increased Female Authorship in Otolaryngology Over the Past  
36 480 Three Decades. *Laryngoscope* 2000;**110**:358–61. doi:10.1097/00005537-200003000-00005
- 38 481 51 Van Leeuwen T, Hoorens S, Grant J. Using bibliometrics to support the procurement of NIHR  
39 482 biomedical research centres in England. *Res Eval* 2009;**18**:71–82.  
40 483 doi:10.3152/095820209X414178
- 42 484 52 Leeuwen T Van, Grant J. Bibliometric analysis of highly cited publications of health research in  
43 485 England, 1995-2004. 2007. [https://www.rand.org/pubs/working\\_papers/WR368.html](https://www.rand.org/pubs/working_papers/WR368.html)

## 486 Additional files list

487 **Figure 1** Publication analysis workflow. The workflow shows the process of extracting data according  
488 to gender from six types of authorship.

489 **Figure 2** Yearly trends in scientific authorship by gender (male and female), April 2012 - March 2017.  
490 This plot represents the yearly variation of the proportion of male and female authors according to  
491 six types of authorship between the years of publication/acceptance from 2012 to 2017.

1  
2  
3  
4  
5  
6  
7  
8  
9  
10  
11  
12  
13  
14  
15  
16  
17  
18  
19  
20  
21  
22  
23  
24  
25  
26  
27  
28  
29  
30  
31  
32  
33  
34  
35  
36  
37  
38  
39  
40  
41  
42  
43  
44  
45  
46  
47  
48  
49  
50  
51  
52  
53  
54  
55  
56  
57  
58  
59  
60

**Supplementary File 1**

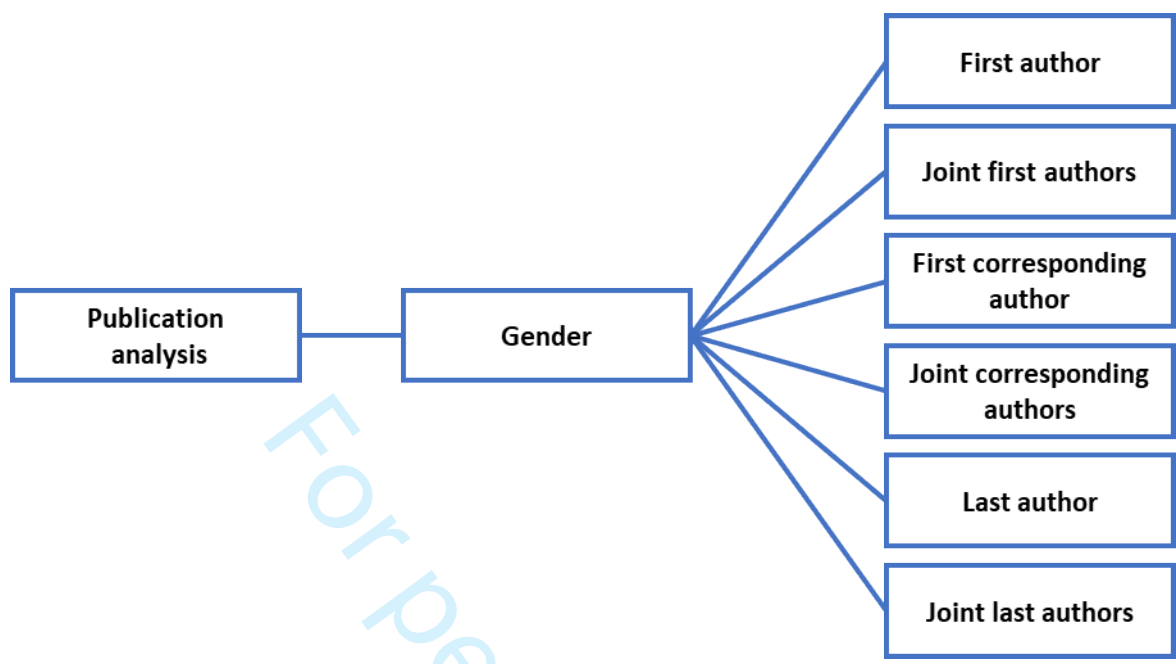

**Figure 1** Publication analysis workflow.

1  
2  
3  
4  
5  
6  
7  
8  
9  
10  
11  
12  
13  
14  
15  
16  
17  
18  
19  
20  
21  
22  
23  
24  
25  
26  
27  
28  
29  
30  
31  
32  
33  
34  
35  
36  
37  
38  
39  
40  
41  
42  
43  
44  
45  
46  
47  
48  
49  
50  
51  
52  
53  
54  
55  
56  
57  
58  
59  
60

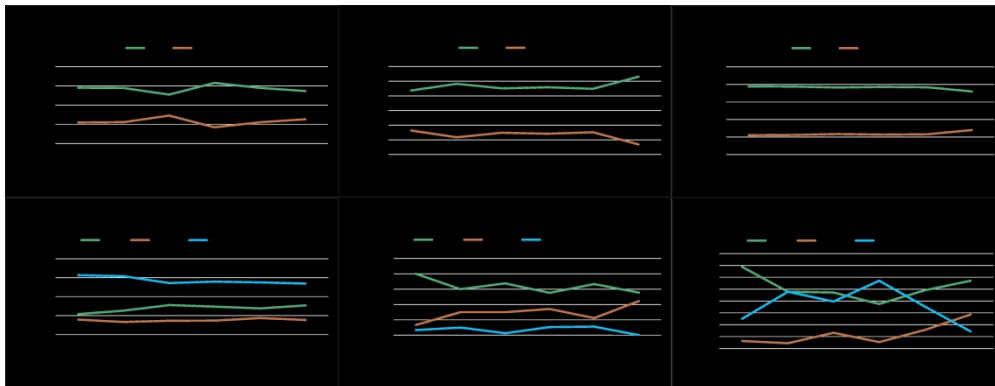

381x146mm (300 x 300 DPI)

**STROBE Statement**

## Checklist of items that should be included in reports of observational studies

| Section/Topic             | Item No | Recommendation                                                                                                                                                                                  | Reported on Page No |
|---------------------------|---------|-------------------------------------------------------------------------------------------------------------------------------------------------------------------------------------------------|---------------------|
| <b>Title and abstract</b> | 1       | (a) Indicate the study's design with a commonly used term in the title or the abstract                                                                                                          | Pages 1-2           |
|                           |         | (b) Provide in the abstract an informative and balanced summary of what was done and what was found                                                                                             | Page 2              |
| <b>Introduction</b>       |         |                                                                                                                                                                                                 |                     |
| Background/rationale      | 2       | Explain the scientific background and rationale for the investigation being reported                                                                                                            | Pages 4-5           |
| Objectives                | 3       | State specific objectives, including any pre-specified hypotheses                                                                                                                               | Pages 4-5           |
| <b>Methods</b>            |         |                                                                                                                                                                                                 |                     |
| Study design              | 4       | Present key elements of study design early in the paper                                                                                                                                         | Page 5              |
| Setting                   | 5       | Describe the setting, locations, and relevant dates, including periods of recruitment, exposure, follow-up, and data collection                                                                 | Pages 5-6           |
| Participants              | 6       | (a) <i>Cohort study</i> —Give the eligibility criteria, and the sources and methods of selection of participants. Describe methods of follow-up: N/A                                            |                     |
|                           |         | <i>Case-control study</i> —Give the eligibility criteria, and the sources and methods of case ascertainment and control selection. Give the rationale for the choice of cases and controls: N/A |                     |
|                           |         | <i>Cross-sectional study</i> —Give the eligibility criteria, and the sources and methods of selection of participants: Pages 5-6                                                                |                     |
| Variables                 | 7       | (b) <i>Cohort study</i> —For matched studies, give matching criteria and number of exposed and unexposed                                                                                        | N/A                 |
|                           |         | <i>Case-control study</i> —For matched studies, give matching criteria and the number of controls per case                                                                                      | N/A                 |
|                           |         | Clearly define all outcomes, exposures, predictors, potential confounders, and effect modifiers. Give diagnostic criteria, if applicable                                                        | Page 6              |
| Data sources/measurement  | 8*      | For each variable of interest, give sources of data and details of methods of assessment (measurement). Describe comparability of assessment methods if there is more than one group            | Page 6              |
| Bias                      | 9       | Describe any efforts to address potential sources of bias                                                                                                                                       | Page 3              |
| Study size                | 10      | Explain how the study size was arrived at                                                                                                                                                       | Page 6              |
| Quantitative variables    | 11      | Explain how quantitative variables were handled in the analyses. If applicable, describe which groupings were chosen and why                                                                    | Page 6              |
| Statistical methods       | 12      | (a) Describe all statistical methods, including those used to control for confounding                                                                                                           | Page 6              |
|                           |         | (b) Describe any methods used to examine subgroups and interactions                                                                                                                             | Page 6              |
|                           |         | (c) Explain how missing data were addressed                                                                                                                                                     | N/A                 |
|                           |         | (d) <i>Cohort study</i> —If applicable, explain how loss to follow-up was addressed                                                                                                             |                     |
|                           |         | <i>Case-control study</i> —If applicable, explain how matching of cases and controls was addressed                                                                                              | N/A                 |
|                           |         | <i>Cross-sectional study</i> —If applicable, describe analytical methods taking account of sampling strategy                                                                                    |                     |
|                           |         | (e) Describe any sensitivity analyses                                                                                                                                                           | N/A                 |

| Section/Topic     | Item No | Recommendation                                                                                                                                                                                                  | Reported on Page No                                                                           |
|-------------------|---------|-----------------------------------------------------------------------------------------------------------------------------------------------------------------------------------------------------------------|-----------------------------------------------------------------------------------------------|
| <b>Results</b>    |         |                                                                                                                                                                                                                 |                                                                                               |
| Participants      | 13*     | (a) Report numbers of individuals at each stage of study—eg numbers potentially eligible, examined for eligibility, confirmed eligible, included in the study, completing follow-up, and analysed               | No participants were used in this study. Scientific publications were used only.<br>Pages 6-9 |
|                   |         | (b) Give reasons for non-participation at each stage                                                                                                                                                            | N/A                                                                                           |
|                   |         | (c) Consider use of a flow diagram                                                                                                                                                                              | Supplementary file 1                                                                          |
| Descriptive data  | 14*     | (a) Give characteristics of study participants (eg demographic, clinical, social) and information on exposures and potential confounders                                                                        | Table 1 on page 7 and Table 2 on page 8                                                       |
|                   |         | (b) Indicate number of participants with missing data for each variable of interest                                                                                                                             | N/A                                                                                           |
|                   |         | (c) <i>Cohort study</i> —Summarise follow-up time (eg, average and total amount)                                                                                                                                | N/A                                                                                           |
| Outcome data      | 15*     | <i>Cohort study</i> —Report numbers of outcome events or summary measures over time                                                                                                                             | N/A                                                                                           |
|                   |         | <i>Case-control study</i> —Report numbers in each exposure category, or summary measures of exposure                                                                                                            | N/A                                                                                           |
|                   |         | <i>Cross-sectional study</i> —Report numbers of outcome events or summary measures                                                                                                                              | Pages 7-9                                                                                     |
| Main results      | 16      | (a) Give unadjusted estimates and, if applicable, confounder-adjusted estimates and their precision (eg, 95% confidence interval).<br>Make clear which confounders were adjusted for and why they were included | N/A                                                                                           |
|                   |         | (b) Report category boundaries when continuous variables were categorized                                                                                                                                       | N/A                                                                                           |
|                   |         | (c) If relevant, consider translating estimates of relative risk into absolute risk for a meaningful time period                                                                                                | N/A                                                                                           |
| Other analyses    | 17      | Report other analyses done—eg analyses of subgroups and interactions, and sensitivity analyses                                                                                                                  | Pages 8-9                                                                                     |
| <b>Discussion</b> |         |                                                                                                                                                                                                                 |                                                                                               |
| Key results       | 18      | Summarise key results with reference to study objectives                                                                                                                                                        | Page 9                                                                                        |
| Limitations       | 19      | Discuss limitations of the study, taking into account sources of potential bias or imprecision. Discuss both direction and magnitude of any potential bias                                                      | Pages 3 & 10                                                                                  |

|   |                          |    |                                                                                                                                                                            |         |
|---|--------------------------|----|----------------------------------------------------------------------------------------------------------------------------------------------------------------------------|---------|
| 1 | Interpretation           | 20 | Give a cautious overall interpretation of results considering objectives, limitations, multiplicity of analyses, results from similar studies, and other relevant evidence | Page 10 |
| 2 |                          |    |                                                                                                                                                                            |         |
| 3 | Generalisability         | 21 | Discuss the generalisability (external validity) of the study results                                                                                                      | Page 10 |
| 4 | <b>Other Information</b> |    |                                                                                                                                                                            |         |
| 5 |                          |    |                                                                                                                                                                            |         |
| 6 | Funding                  | 22 | Give the source of funding and the role of the funders for the present study and, if applicable, for the original study on which the present article is based              | Page 11 |
| 7 |                          |    |                                                                                                                                                                            |         |

8 *\*Give information separately for cases and controls in case-control studies and, if applicable, for exposed and unexposed groups in cohort and cross-sectional studies.*

9 **Note:** An Explanation and Elaboration article discusses each checklist item and gives methodological background and published examples of transparent reporting. The STROBE checklist is  
 10 best used in conjunction with this article (freely available on the Web sites of PLoS Medicine at <http://www.plosmedicine.org/>, Annals of Internal Medicine at <http://www.annals.org/>, and  
 11 Epidemiology at <http://www.epidem.com/>). Information on the STROBE Initiative is available at [www.strobe-statement.org](http://www.strobe-statement.org).

For peer review only

12  
13  
14  
15  
16  
17  
18  
19  
20  
21  
22  
23  
24  
25  
26  
27  
28  
29  
30  
31  
32  
33  
34  
35  
36  
37  
38  
39  
40  
41  
42  
43  
44  
45  
46  
47

# BMJ Open

## Gender parity in scientific authorship in a National Institute for Health Research Biomedical Research Centre: A bibliometric analysis

|                                 |                                                                                                                                                                                                                                                                                                                                                                                                                                                                                                                                                                                                                                                                                                                                                                                                                                                                                                                                                                                                             |
|---------------------------------|-------------------------------------------------------------------------------------------------------------------------------------------------------------------------------------------------------------------------------------------------------------------------------------------------------------------------------------------------------------------------------------------------------------------------------------------------------------------------------------------------------------------------------------------------------------------------------------------------------------------------------------------------------------------------------------------------------------------------------------------------------------------------------------------------------------------------------------------------------------------------------------------------------------------------------------------------------------------------------------------------------------|
| Journal:                        | <i>BMJ Open</i>                                                                                                                                                                                                                                                                                                                                                                                                                                                                                                                                                                                                                                                                                                                                                                                                                                                                                                                                                                                             |
| Manuscript ID                   | bmjopen-2020-037935.R1                                                                                                                                                                                                                                                                                                                                                                                                                                                                                                                                                                                                                                                                                                                                                                                                                                                                                                                                                                                      |
| Article Type:                   | Original research                                                                                                                                                                                                                                                                                                                                                                                                                                                                                                                                                                                                                                                                                                                                                                                                                                                                                                                                                                                           |
| Date Submitted by the Author:   | 17-Sep-2020                                                                                                                                                                                                                                                                                                                                                                                                                                                                                                                                                                                                                                                                                                                                                                                                                                                                                                                                                                                                 |
| Complete List of Authors:       | Shah, Syed Ghulam Sarwar; Oxford University Hospitals NHS Foundation Trust, NIHR Oxford Biomedical Research Centre; University of Oxford, Radcliffe Department of Medicine<br>Dam, Rinita; University of Oxford, Radcliffe Department of Medicine<br>Milano, Maria; University of Oxford Medical Sciences Division, Radcliffe Department of Medicine<br>Edmunds , Laurel ; University of Oxford Medical Sciences Division, Radcliffe Department of Medicine<br>Henderson, Lorna; Oxford University Hospitals NHS Foundation Trust, NIHR Oxford Biomedical Research Centre<br>Hartley, Catherine; Bodleian Health Care Libraries<br>Coxall, Owen; Bodleian Health Care Libraries<br>Ovseiko, Pavel; University of Oxford Medical Sciences Division, Radcliffe Department of Medicine<br>Buchan, Alastair; University of Oxford Medical Sciences Division, Radcliffe Department of Medicine<br>Kiparoglou, Vasiliki; Oxford University Hospitals NHS Foundation Trust, NIHR Oxford Biomedical Research Centre |
| <b>Primary Subject Heading</b>: | Medical publishing and peer review                                                                                                                                                                                                                                                                                                                                                                                                                                                                                                                                                                                                                                                                                                                                                                                                                                                                                                                                                                          |
| Secondary Subject Heading:      | Ethics, Medical education and training, Medical management, Health informatics                                                                                                                                                                                                                                                                                                                                                                                                                                                                                                                                                                                                                                                                                                                                                                                                                                                                                                                              |
| Keywords:                       | NATURAL SCIENCE DISCIPLINES, EDUCATION & TRAINING (see Medical Education & Training), Change management < HEALTH SERVICES ADMINISTRATION & MANAGEMENT, Health policy < HEALTH SERVICES ADMINISTRATION & MANAGEMENT, Organisational development < HEALTH SERVICES ADMINISTRATION & MANAGEMENT, STATISTICS & RESEARCH METHODS                                                                                                                                                                                                                                                                                                                                                                                                                                                                                                                                                                                                                                                                                 |
|                                 |                                                                                                                                                                                                                                                                                                                                                                                                                                                                                                                                                                                                                                                                                                                                                                                                                                                                                                                                                                                                             |

SCHOLARONE™  
Manuscripts



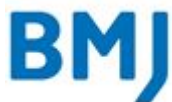

I, the Submitting Author has the right to grant and does grant on behalf of all authors of the Work (as defined in the below author licence), an exclusive licence and/or a non-exclusive licence for contributions from authors who are: i) UK Crown employees; ii) where BMJ has agreed a CC-BY licence shall apply, and/or iii) in accordance with the terms applicable for US Federal Government officers or employees acting as part of their official duties; on a worldwide, perpetual, irrevocable, royalty-free basis to BMJ Publishing Group Ltd ("BMJ") its licensees and where the relevant Journal is co-owned by BMJ to the co-owners of the Journal, to publish the Work in this journal and any other BMJ products and to exploit all rights, as set out in our [licence](#).

The Submitting Author accepts and understands that any supply made under these terms is made by BMJ to the Submitting Author unless you are acting as an employee on behalf of your employer or a postgraduate student of an affiliated institution which is paying any applicable article publishing charge ("APC") for Open Access articles. Where the Submitting Author wishes to make the Work available on an Open Access basis (and intends to pay the relevant APC), the terms of reuse of such Open Access shall be governed by a Creative Commons licence – details of these licences and which [Creative Commons](#) licence will apply to this Work are set out in our licence referred to above.

Other than as permitted in any relevant BMJ Author's Self Archiving Policies, I confirm this Work has not been accepted for publication elsewhere, is not being considered for publication elsewhere and does not duplicate material already published. I confirm all authors consent to publication of this Work and authorise the granting of this licence.

1  
2  
3  
4 1 **Gender parity in scientific authorship in a National Institute for**  
5 2 **Health Research Biomedical Research Centre: A bibliometric analysis**  
6

7  
8 3 Syed Ghulam Sarwar Shah<sup>1,2\*</sup>, [Sarwar.Shah@ouh.nhs.uk](mailto:Sarwar.Shah@ouh.nhs.uk) \* Corresponding author  
9

10 4 Rinita Dam<sup>1\*</sup>, [rinita.dam@rdm.ox.ac.uk](mailto:rinita.dam@rdm.ox.ac.uk) \* Corresponding author  
11

12 5 Maria Julia Milano<sup>1+</sup>, [colomilano@gmail.com](mailto:colomilano@gmail.com)  
13

14 6 Laurel D Edmunds<sup>1</sup>, [laureledmunds@gmail.com](mailto:laureledmunds@gmail.com)  
15

16 7 Lorna R Henderson<sup>1,2</sup>, [lorna.henderson@ouh.nhs.uk](mailto:lorna.henderson@ouh.nhs.uk)  
17

18 8 Catherine R Hartley<sup>3</sup>, [Catherine.hartley@bodleian.ox.ac.uk](mailto:Catherine.hartley@bodleian.ox.ac.uk)  
19

20 9 Owen Coxall<sup>3</sup>, [owen.coxall@bodleian.ox.ac.uk](mailto:owen.coxall@bodleian.ox.ac.uk)  
21

22 10 Pavel V Ovseiko<sup>1</sup>, [pavel.ovseiko@rdm.ox.ac.uk](mailto:pavel.ovseiko@rdm.ox.ac.uk)  
23

24 11 Alastair M Buchan<sup>1</sup>, [alastair.buchan@medsci.ox.ac.uk](mailto:alastair.buchan@medsci.ox.ac.uk)  
25

26 12 Vasiliki Kiparoglou<sup>2,4</sup>, [vasiliki.kiparoglou@ouh.nhs.uk](mailto:vasiliki.kiparoglou@ouh.nhs.uk)  
27  
28

29 13 **Author institutional addresses**

30  
31 14 <sup>1</sup> Radcliffe Department of Medicine. Medical Sciences Division, University of Oxford, Oxford, United  
32 Kingdom.  
33

34 16 <sup>2</sup> National Institute for Health Research Oxford Biomedical Research Centre, Oxford University  
35 Hospitals NHS Foundation Trust, Oxford, United Kingdom.  
36

37 18 <sup>3</sup> Bodleian Health Care Libraries, University of Oxford, Oxford, United Kingdom.  
38

39 19 <sup>4</sup>Nuffield Department of Primary Health Care Sciences University of Oxford, Oxford.  
40

41  
42 20 +SGSS, RD and MJM contributed equally to this paper and are joint first authors on this work.  
43

44 21 Word count: 5542 (excluding references)  
45  
46  
47  
48  
49  
50  
51  
52  
53  
54  
55  
56  
57  
58  
59  
60

## 22 ABSTRACT

23 **Objective:** Scientific authorship is a vital marker of success in academic careers and gender equity is a  
24 key performance metric in research. However, there is little understanding of gender equity in  
25 publications in biomedical research centres funded by the National Institute for Health Research  
26 (NIHR). This study assesses the gender parity in scientific authorship of biomedical research.

27  
28 **Design:** A retrospective descriptive study.

29 **Setting:** NIHR Oxford Biomedical Research Centre.

30 **Data:** Data comprised 2409 publications that were either accepted or published between April 2012  
31 and March 2017. The publications were classified as basic science studies, clinical studies (both trial  
32 and non-trial studies), and other studies (comments, editorials, systematic reviews, reviews, opinions,  
33 book chapters, meeting reports, guidelines and protocols).

34 **Main outcome measures:** Gender of authors, defined as a binary variable comprising either male or  
35 female categories, in six authorship categories: first author, joint first authors, first corresponding  
36 author, joint corresponding authors, last author and joint last authors.

37 **Results:** Publications comprised 39% clinical research (n=939), 27% basic research (n=643), and 34%  
38 other types of research (n=827). The proportion of female authors as first author (41%), first  
39 corresponding authors (34%) and last author (23%) was statistically significantly lower than male  
40 authors in these authorship categories ( $P < 0.001$ ). Of total joint first authors (n=458), joint  
41 corresponding authors (n=169), and joint last authors (n=229), female only authors comprised  
42 statistically significant ( $P < 0.001$ ) smaller proportions i.e. 15% (n=69), 29% (n=49) and 10% (n=23)  
43 respectively, compared to male only authors in these joint authorship categories. There was a  
44 statistically significant association between gender of the last author(s) with gender of the first  
45 author(s) ( $P < 0.001$ ), first corresponding author(s) ( $P < 0.001$ ) and joint last author(s) ( $P < 0.001$ ). The  
46 mean impact factor (IF) of journals was statistically significantly higher when the first corresponding  
47 author was male compared to female (Mean IF: 10.00 vs. 8.77,  $P = 0.020$ ); however, the IF of journal  
48 was not statistically different when there were male and female authors as first authors and last  
49 authors.

50 **Conclusions:** Although there are increasing trends of female authors as first authors (41%) and last  
51 authors (23%) (when compared with the current literature), female authors are still underrepresented  
52 compared to male authors in all six categories of scientific authorship in biomedical research. Further  
53 research is needed to encourage gender parity in different categories of scientific authorship. Male  
54 corresponding authors are more likely to publish articles in prestigious journals with high impact factor  
55 and both male and female authors at first and last authorship positions publish articles in journals with  
56 almost equal impact factor.

1  
2  
3 57 **Strengths and limitations of this study**  
4

- 5 58 • This is the first study to investigate gender parity in six categories of scientific authorship: first  
6 59 authors, first corresponding authors, last authors and three joint authorship categories i.e.  
7 60 joint first authors, joint corresponding authors and joint last authors in biomedical research.  
8  
9  
10 61 • This study provides an important benchmark on gender equity in scientific authorship for  
11 62 other NIHR funded centres and organisations in England.  
12  
13 63 • This study provides evidence that male first corresponding authors are more likely to publish  
14 64 articles in prestigious journals with high impact factor compared to female first corresponding  
15 65 authors.  
16  
17  
18 66 • Both male and female authors at first and last authorship positions publish articles in journals  
19 67 with almost equal impact factor.  
20  
21  
22 68 • The generalisability of the findings of this study may be limited due to differences in medical  
23 69 specialities, research areas, institutional cultures, and levels of support to individual  
24 70 researchers.  
25  
26  
27 71 • Using secondary sources for determining the gender of authors may have limitations, which  
28 72 could be avoided by seeking relevant information from original authors and institution  
29 73 affiliation at the time of submission.  
30

31 74 **Keywords:** Responsible Research and Innovation, Gender Equity, Scientific Authorship, National  
32 75 Institution for Health Research, Biomedical Research Centres, Evaluation, Translational Research  
33 76 Organisations, Translational Research, Basic Science Research, Journal Impact Factor, Journal Prestige.  
34  
35  
36  
37  
38  
39  
40  
41  
42  
43  
44  
45  
46  
47  
48  
49  
50  
51  
52  
53  
54  
55  
56  
57  
58  
59  
60

## 77 INTRODUCTION

78 Promoting Responsible Research and Innovation (RRI) is a major strategy of the “Science with and for  
79 Society” work programme of the European Union’s (EU) Horizon 2020 Framework Programme for  
80 Research and Innovation[1]. RRI aims to build capacity and develop innovative ways to connect science  
81 to society [2]. The RRI approach enables all societal members (such as researchers, citizens,  
82 policymakers, businesses and third sector organisations) to work together during the research and  
83 innovation process in order to better align research and innovation with the values, needs and  
84 expectations of the society [1,2]. The RRI strategy includes the “keys” of public engagement, open  
85 access, gender, ethics and science education, and two further “keys”: sustainability and social justice,  
86 which have been added recently [3]. The idea is that by prioritising these key components of RRI, it  
87 would help make science more attractive to young people and society, and raise awareness of the  
88 meaning of responsible science [2].

89 We have focussed on the ‘gender’ element of the RRI because it is imperative to advance gender  
90 equality within research institutions, as well as within the design and content of research and  
91 innovation [1]. The issue of enhancing female participation in economic decision-making has become  
92 prominent in the national, European and international spheres, with a particular focus on the  
93 economic dimension of gender diversity [4]. In order to achieve a fair female participation within  
94 positions of power, it is recommended that women should hold half of the total seats in board rooms  
95 [5], however, a ratio between 40% and 60%, also known as a “gender balance zone” [6], is considered  
96 acceptable – a threshold that is set by the European Commission [4].

97 From the perspective of gender equality in academia and scientific research, gender parity in scientific  
98 authorship is an important measure of achievement. The term gender parity refers to “the equal  
99 contribution of women and men to different dimensions of life” and it is operationalised as a “relative  
100 equality in terms of numbers and proportions of women and men” for a particular indicator” [7].  
101 Gender (dis)parity in scientific authorship has important implications for gender equity in academic  
102 advancement [8] because scientific authorship is commonly used as a measure of academic  
103 productivity that is used for performance management, reward, and recognition [9,10]. The  
104 acceleration of women’s advancement and leadership in research is one of the stated objectives of  
105 the National Institute of Health Research (NIHR) in the United Kingdom (UK) and it is imperative for  
106 the RRI in the wider European research area. Yet, there is limited research concerning gender equity  
107 in scientific authorship of translational research funded through NIHR biomedical research centres  
108 (BRCs).

109 In the UK, women currently outnumber men in medical schools [11]; however, a persistent gender  
110 disparity in scientific publications remains [10,12–23]. While the proportion of women as first and  
111 senior (last) authors of original medical research has increased over the past few decades [24], women  
112 are still significantly underrepresented as authors of research articles in medical journals, especially  
113 as first and senior authors [19,20,22,25], which are considered as prestigious authorship positions  
114 [10,14]. For example, in radiology the proportion of women as first author increased from 8% in 1978  
115 to 32% in 2013 and senior author increased from 7% in 1978 to 22% in 2013 [20]. Similarly, in  
116 gastroenterology the proportion of women as first author increased from 9% in 1992 to 29% in 2012,  
117 and senior author increased from 5% in 1992 to 15% in 2012 [22].

1  
2  
3 118 The profile of gender equity in higher education and research has been raised by the introduction of  
4 119 Athena SWAN-linked funding incentives by the NIHR [26–28]. While Athena SWAN awards are useful  
5 120 markers of achievement for higher education institutions and research institutes, they alone are  
6 121 insufficient to assess and monitor the progress of NIHR BRCs towards gender equity [29]. Currently,  
7 122 the proportion of women and the rate of their achievements are not tracked routinely by the NIHR  
8 123 BRCs and little is known about how much women contribute to scientific research and innovation in  
9 124 the BRCs. It is important to study the acceleration of women’s advancement and leadership in  
10 125 translational research in line with the stated objectives of the NIHR within the UK and RRI within the  
11 126 wider European research area through the collection of gender-disaggregated bibliometric data and  
12 127 analysis of scientific authorship by gender.

13 128 The primary objective of this study was to assess the gender parity in six types of scientific authorship  
14 129 in biomedical research. The secondary objective was to assess whether male and female authors  
15 130 publish articles in journals with different prestige levels.

## 131 **METHODS**

### 132 *Study design*

133 A retrospective descriptive study.

### 134 *Setting*

135 This study was conducted at the NIHR Oxford BRC, which is research collaboration between the Oxford  
136 University Hospitals NHS Foundation Trust and the University of Oxford [30]. The aim of NIHR BRCs is  
137 to support translational research and innovation to improve healthcare for patients [31]. During the  
138 study period (April 2012-March 2017), the NIHR Oxford BRC was awarded £96m to support research  
139 across nine research themes, five cross-cutting themes, and a range of underpinning platforms. The  
140 research themes included Blood, Cancer, Cardiovascular, Dementia and Cerebrovascular Disease,  
141 Diabetes, Functional Neuroscience and Imaging, Infection, Translational Physiology, and Vaccines. The  
142 crosscutting themes included Genomic Medicine, Immunity and Inflammation, Surgical Innovation  
143 and Evaluation, Biomedical Informatics and Technology, and Prevention and Population Care. The  
144 major underpinning platforms included a Biorepository, Education and Training, Public Engagement,  
145 and Research Governance. Staff who have all or part of their salary funded through the BRC award are  
146 members of the NIHR faculty. Between April 2012 and March 2017, there were 73.64% principal  
147 investigators (scientists that have won research grants and are ultimately responsible for the conduct  
148 of research studies); 59.76% NIHR investigators (scientists leading and undertaking research); 31.85%  
149 NIHR associates (staff supporting research that are led by others) and 52.97% NIHR trainees (those  
150 who are engaged in research training leading to a higher degree by research) that were male. It is a  
151 contractual requirement to report the number of BRC supported publications published by  
152 researchers funded or supported by the NIHR research funds on an annual basis. Additionally, the  
153 NIHR uses bibliometric analyses to inform eligibility for NIHR funding [32,33]. This study was carried  
154 out as part of a wider programme of research on the markers of achievement for assessing and  
155 monitoring gender equity in translational research organisations [29]. During the same study period,  
156 the NIHR Oxford BRC was awarded with external funding from research councils, research charities,  
157 the Department of Health, industry collaborators and non-commercial organisations. Research

1  
2  
3 158 councils have provided the highest amount of external funding with an amount of £265.5m. However,  
4 159 current data from the NIHR Oxford BRC are not available at an individual level; hence, it is not possible  
5  
6 160 to present this data according to gender.  
7

### 8 161 **Data**

9  
10 162 Data comprised translational research publications published by researchers funded or supported by  
11 163 the NIHR Oxford BRC. The eligibility criteria for inclusion of a publication were funding or support by  
12 164 the NIHR Oxford BRC and publication between April 2012 and March 2017. Based on these criteria,  
13 165 2409 publications were identified. These publications were classified as: basic science studies, clinical  
14 166 studies (both trial and non-trial studies), and other studies (comments, editorials, systematic reviews,  
15 167 reviews, opinions, meeting reports, guidelines and protocols).  
16  
17

### 18 168 **Main outcome measures**

19  
20 169 The main outcome measures were: (1) Gender of authors, defined as a binary variable comprising,  
21 170 either male or female categories, (2) Six categories of scientific authorship: first author, joint first  
22 171 authors, first corresponding author, joint corresponding authors, last author and joint last authors  
23 172 (Figure 1). These categories are conventionally associated with the highest amount of contribution,  
24 173 credit and prestige [10,14].  
25  
26

27 174 <Insert> **Figure 1** Publication analysis workflow. <Here>  
28

29 175 First author was defined as the first-named author of the publication. Publications that consisted of  
30 176 single authors were categorised as first authors. We considered the first author to be the main  
31 177 intellectual contributor in the publication, in terms of study design, data collection and analysis, and  
32 178 manuscript writing. Joint first authors were defined as two or more authors who were named as equal  
33 179 contributors and mentioned as joint first authors of the publication. The first corresponding author  
34 180 was defined as the only author who was reported as a corresponding author in the publication and  
35 181 his/her contact details such as an institutional address and/or an email address were provided for  
36 182 correspondence in the publication. Joint corresponding authors were defined as two or more authors  
37 183 who were listed or marked as corresponding authors and their contact details were provided for  
38 184 correspondence in the publication. Last author was defined as the last-named author of a publication.  
39 185 The last author was considered to be a group leader or principal investigator who may have provided  
40 186 significant intellectual contribution or supervision of the research work as well as acquisition of  
41 187 research funding [14,34]. Joint last authors were defined as two or more authors who were named as  
42 188 equal contributors in the publication and their names were mentioned as joint last authors in the  
43 189 publication. A major confounding factor, for which we could not control, was the informal nature of  
44 190 the conventions for the sequence and role of authors [34]. Although conventions for scientific  
45 191 authorship are well established in biomedical sciences [35,36], they may vary between different  
46 192 research areas and even between different research groups within the same area.  
47  
48  
49  
50  
51  
52

### 53 193 **Determination of gender of authors**

54 194 The gender of the authors was defined as a binary variable comprising either male or female  
55 195 categories, which were determined based on the first name of authors in all six categories of  
56 196 authorship included in the analysis. When the first names of authors were initialled in the publication  
57 197 or were difficult to associate with either male or female gender, further information was sought  
58  
59  
60

1  
2  
3 198 through searching their institutional webpages and online social network sites such as the LinkedIn  
4 199 and ResearchGate. We also used Gender APIs (gender-api.com and genderapi.io) when it was not  
5 200 possible to ascertain the gender of the authors by the above-mentioned sources. In addition, we  
6 201 contacted five authors directly via email to ascertain their gender. After completing data coding by  
7 202 two researchers (MJM and RD), to ensure the accuracy of data coding, 10% of the data were checked  
8 203 independently (CH). Consensus was achieved through discussion between the researchers on data  
9 204 fields that did not match the assigning of the gender of authors and types of authorship (Figure 1).

### 205 ***Gender of authors and journal prestige***

206 For assessing whether male and female authors publish articles in less, equal or more prestigious  
207 journals, we used journal impact factor as a proxy for the prestige of a journal. We extracted data on  
208 journal impact factors from the Journal citation report 2019 and for a few articles, we used the latest  
209 available impact factor reported on the journal websites.

### 210 ***Statistical analysis***

211 Data were analysed using frequencies including counts and percentages. Chi-square tests were used  
212 for identifying statistically significant differences and associations between male and female authors  
213 in various categories of authorship. Cochran linear trend test was used to determine trends over time  
214 using Slezák et al tool [37]. T-Tests were used to determine differences in the mean impact factor of  
215 journals with publications by male and female authors in all three authorship categories. The level of  
216 significance was set at  $p < 0.05$ . Data were analysed using the IBM SPSS Statistics for Windows, Version  
217 25.0 (Armonk, NY: IBM Corp.). Visualisations were created in the Microsoft Excel and BoxPlotR – a free  
218 online tool [38].

### 219 ***Patient and public involvement statement***

220 There was no patient or public involvement in the study design.

## 221 **RESULTS**

### 222 ***Types of publication***

223 Table 1 presents an overview of the types of publication by year. Clinical research studies (both trial  
224 and non-trial studies) comprised 39% (n=939), basic science research 27% (n=643) and a third of  
225 publications (34%, n=827) included other types of publication, such as systematic reviews, reviews,  
226 research protocols, editorials, guidelines, opinions, comments, and meeting reports.



227 **Table 1.** Number and types of publication by year of acceptance

| Year<br>(Accepted) | Types of publication<br>Count (%) |                   |                                 |                   | Total Count<br>(%) |
|--------------------|-----------------------------------|-------------------|---------------------------------|-------------------|--------------------|
|                    | Basic<br>science                  | Clinical<br>trial | Clinical study -<br>Not a trial | Other*            |                    |
| 2012†              | 75 (27.6)                         | 18 (6.6)          | 90 (33.1)                       | 89 (32.7)         | 272 (100)          |
| 2013‡              | 151 (28.2)                        | 27 (5.0)          | 183 (34.2)                      | 174 (32.5)        | 535 (100)          |
| 2014‡              | 122 (22.2)                        | 29 (5.3)          | 204 (37.2)                      | 194 (35.3)        | 549 (100)          |
| 2015‡              | 137 (24.7)                        | 48 (8.7)          | 158 (28.5)                      | 211 (38.1)        | 554 (100)          |
| 2016‡              | 137 (31.8)                        | 31 (7.2)          | 120 (27.8)                      | 143 (33.2)        | 431 (100)          |
| 2017‡              | 21 (30.9)                         | 5 (7.4)           | 26 (38.2)                       | 16 (23.5)         | 68 (100)           |
| <b>Total</b>       | <b>643 (26.7)</b>                 | <b>158 (6.6)</b>  | <b>781 (32.4)</b>               | <b>827 (34.3)</b> | <b>2409 (100)</b>  |

228 †April-December, ‡January-December ‡January-March, \*systematic reviews, reviews, research  
229 protocols, editorials, guidelines, opinions, comments, and meeting reports

### 230 *Authorship type and Gender*

231 Table 2 presents an overview of gender of authors by types of authorship. Male authors were  
232 statistically significant more likely to be first authors (59%,  $P < 0.001$ ), first corresponding authors (66%,  
233  $P < 0.001$ ) and last authors (77%,  $P < 0.001$ ) (Table 2). Furthermore, analyses of joint authorship  
234 categories revealed that the proportion of 'female only' authors was statistically significantly lower  
235 than 'male only' authors in the joint corresponding authors (29%,  $P < 0.001$ ) and joint last authors  
236 categories (10%,  $P < 0.001$ ) (Table 2). However, in the joint first authors category, the proportion of  
237 'male and female' as joint first authors (57%,  $P < 0.001$ ) was statistically significantly higher than male  
238 only and female only first authors (Table 2).

239 **Table 2.** Authorship type and gender of authors

| Authorship type<br>Number of publications in the category | Gender of authors<br>Count (%) |             |                 | Significance<br>p-value |
|-----------------------------------------------------------|--------------------------------|-------------|-----------------|-------------------------|
|                                                           | Male only                      | Female only | Male and female |                         |
| First author (n=2409)                                     | 1413 (58.7)                    | 994 (41.3)  | N/A*            | <0.001                  |
| First corresponding author (n=2409)                       | 1565 (65.0)                    | 806 (33.5)  | N/A             | <0.001                  |
| Last author (n=2409)                                      | 1853 (76.9)                    | 553 (23.0)  | N/A             | <0.001                  |
| Joint first authors (n=458)                               | 127 (27.7)                     | 69 (15.1)   | 262 (57.2)      | <0.001                  |
| Joint corresponding authors (n=169)                       | 107 (63.3)                     | 49 (29.0)   | 13 (7.7)        | <0.001                  |
| Joint last authors (n=229)                                | 108 (47.2)                     | 23 (10.0)   | 98 (42.8)       | <0.001                  |

54 \*N/A= not applicable.

### 240 *Gender of authors by types of publication*

241 Table 3 presents an analysis of gender of authors by types of publication (i.e. basic science, clinical  
242 trials, non-trial clinical studies and other research). The analysis showed that the proportions of male

only authors were statistically significantly higher than the proportions of female only authors in three authorship categories: first authors ( $P=0.035$ ), first corresponding authors ( $P < 0.001$ ) and last authors ( $P=0.016$ ) (Table 3). There were no significant differences between the proportions of male only and female only authors in all three joint authorship categories: joint first authors ( $P=0.476$ ), joint corresponding authors ( $P=0.172$ ) and joint last authors ( $P=0.208$ ). Only the statistically significant associations are shown in Table 3.

**Table 3.** Gender of authors by publication type

| Type of research                             | Publication Type |                |                              |            | Significance     |
|----------------------------------------------|------------------|----------------|------------------------------|------------|------------------|
|                                              | Count (%)        |                |                              |            |                  |
|                                              | Basic science    | Clinical trial | Clinical study - Not a trial | Other      | p-value          |
| <b>First author† (n=2407)</b>                |                  |                |                              |            | <b>0.035</b>     |
| <i>Male</i>                                  | 371 (57.8)       | 92 (58.6)      | 433 (55.4)                   | 517 (62.6) |                  |
| <i>Female</i>                                | 271 (42.2)       | 65 (41.4)      | 348 (44.6)                   | 310 (37.5) |                  |
| <b>First corresponding author†† (n=2371)</b> |                  |                |                              |            | <b>&lt;0.001</b> |
| <i>Male</i>                                  | 446 (69.4)       | 100 (63.3)     | 465 (59.5)                   | 554 (67.0) |                  |
| <i>Female</i>                                | 191 (29.7)       | 56 (35.4)      | 307 (39.3)                   | 252 (30.5) |                  |
| <b>Last author (n=2406)</b>                  |                  |                |                              |            | <b>0.016</b>     |
| <i>Male</i>                                  | 503 (78.3)       | 125 (79.6)     | 570 (73.1)                   | 655 (79.2) |                  |
| <i>Female</i>                                | 139 (21.7)       | 32 (20.4)      | 210 (26.9)                   | 172 (20.8) |                  |

### Yearly trends in Authorship by gender

Figure 2 presents the yearly trends in scientific authorship by gender. In all authorship types and across all five years of publication, the proportion of male and female authors varied (Figure 2). The analysis showed women were significantly underrepresented across all years and authorship types. Interestingly, joint first authorship indicated a higher proportion of 'male and female' authors compared to 'male only' and 'female only' authors (Figure 2). We also ran a Cochrane linear trend test to show whether there was any significant change over time. The results revealed that the test was not significant for all six authorship types and years of publications (for all six categories).

<Insert> **Figure 2** Yearly trends in scientific authorship by gender (male and female), April 2012 - March 2017. <here>

### Association between same gender across authorship categories

There was a statistically significant association ( $P < 0.001$ ) between the same gender in first authorship and first corresponding authorship categories and the first author and joint first authors [Table 4(a)].

Furthermore, there were statistically significant associations ( $P < 0.001$ ) between the same gender in the last author category with the same gender of first author(s), first corresponding author(s), Joint corresponding authors and joint last authors [Table 4(b)].

266 However, there was no statistically significant association between the male and female last authors  
 267 with the respective gender of joint first authors ( $P=0.117$ ). Only the statistically significant associations  
 268 are shown in Tables 4(a) and 4(b).

269 **Table 4 (a).** Association between same gender across authorship categories

|                                            | First author<br>Count (%) |            | Significance     |
|--------------------------------------------|---------------------------|------------|------------------|
|                                            | Male                      | Female     | p-value          |
| <b>First corresponding author (n=2371)</b> |                           |            | <b>&lt;0.001</b> |
| <i>Male</i>                                | 1236 (79)                 | 329 (21)   |                  |
| <i>Female</i>                              | 158 (19.6)                | 648 (80.4) |                  |
| <b>First joint authors (n=457)</b>         |                           |            | <b>&lt;0.001</b> |
| <i>Male only</i>                           | 124 (97.6)                | 3 (2.4)    |                  |
| <i>Female only</i>                         | 10 (14.5)                 | 59 (85.5)  |                  |
| <i>both male and female</i>                | 140 (53.6)                | 121 (46.4) |                  |

270 **Table 4 (b).** Association between same gender across authorship categories

| Authorship type                            | Last author<br>Count (%) |            | Significance     |
|--------------------------------------------|--------------------------|------------|------------------|
|                                            | Male                     | Female     | p-value          |
| <b>First author† (n=2406)</b>              |                          |            | <b>&lt;0.001</b> |
| <i>Male</i>                                | 1146 (61.8)              | 267 (48.3) |                  |
| <i>Female</i>                              | 707 (38.2)               | 286 (51.7) |                  |
| <b>First corresponding author (n=2370)</b> |                          |            | <b>&lt;0.001</b> |
| <i>Male</i>                                | 1429 (78.4)              | 136 (24.7) |                  |
| <i>Female</i>                              | 394 (21.6)               | 412 (75.3) |                  |
| <b>Joint corresponding authors(n=168)</b>  |                          |            | <b>&lt;0.001</b> |
| <i>Male only</i>                           | 104 (84.5)               | 3 (6.7)    |                  |
| <i>Female only</i>                         | 13 (10.6)                | 36 (80)    |                  |
| <i>Both male and female</i>                | 6 (4.9)                  | 6 (13.3)   |                  |
| <b>Joint last authors (n=229)</b>          |                          |            | <b>&lt;0.001</b> |
| <i>Male only</i>                           | 106 (63.9)               | 2 (8.2)    |                  |
| <i>Female only</i>                         | 2 (1.2)                  | 21 (33.3)  |                  |
| <i>Both male and female</i>                | 58 (34.9)                | 40 (63.5)  |                  |

271 ***Gender of authors and journal prestige***

272 Of 2388 journal articles, 96.6% (n=2307) were published in journals having an impact factor (mean  
 273 =9.58 ( $\pm$ 12.16), median = 5.36, minimum = 0.39, maximum = 74.7) while only 3.4% (n=81) articles were  
 274 published in journals having no impact factor. There was no statistically significant difference in the  
 275 mean journal impact factor by male and female first and last authors; however, the mean journal  
 276 impact factor was statistically significantly higher for male first corresponding authors compared to  
 277 female first corresponding authors (Table 5, Figure 3).

278 **Table 5.** Impact factor of journals and authorship categories by gender

|                                   | Mean  | Standard deviation | 95% CI      | P- Value     |
|-----------------------------------|-------|--------------------|-------------|--------------|
| <b>First author</b>               |       |                    |             | 0.171        |
| Male                              | 9.88  | 12.46              | 9.18, 10.58 |              |
| Female                            | 9.14  | 11.73              | 8.37, 9.92  |              |
| <b>First corresponding author</b> |       |                    |             | <b>0.020</b> |
| Male                              | 10.00 | 12.72              | 9.34, 10.67 |              |
| Female                            | 8.77  | 10.95              | 7.97, 9.57  |              |
| <b>Last author</b>                |       |                    |             |              |
| Male                              | 9.34  | 11.76              | 8.77, 9.91  | 0.115        |
| Female                            | 10.40 | 13.38              | 9.21, 11.59 |              |

279 <Insert> **Figure 3** Impact factor of journals and authorship categories by gender. <Here>

280 In all three categories of authorship, male and female authors published articles in almost same top  
 281 ten journals with the highest impact factor (Table 6).

282 **Table 6.** Top ten highest impact journals with publications by male and female authors

| Journal                                        | Impact Factor (2019) | First Author |        | First corresponding author |        | Last author |        |
|------------------------------------------------|----------------------|--------------|--------|----------------------------|--------|-------------|--------|
|                                                |                      | Male         | Female | Male                       | Female | Male        | Female |
| New England Journal of Medicine                | 74.699               | ✓            | ✓      | ✓                          | ✓      | ✓           | ✓      |
| Nature Reviews Drug Discovery                  | 64.797               |              | ✓      |                            | ✓      |             | ✓      |
| The Lancet                                     | 60.392               | ✓            | ✓      | ✓                          | ✓      | ✓           | ✓      |
| Nature Reviews Cancer                          | 53.03                | ✓            | ✓      | ✓                          | ✓      | ✓           |        |
| JAMA (Journal of American Medical Association) | 45.54                | ✓            | ✓      | ✓                          | ✓      | ✓           | ✓      |
| Nature                                         | 42.778               | ✓            | ✓      | ✓                          | ✓      | ✓           | ✓      |
| Science                                        | 41.845               | ✓            | ✓      | ✓                          | ✓      | ✓           | ✓      |
| Nature Reviews Immunology                      | 40.358               | ✓            | ✓      | ✓                          | ✓      | ✓           | ✓      |
| Cell                                           | 38.637               | ✓            | ✓      | ✓                          |        | ✓           |        |
| Nature Medicine                                | 36.13                | ✓            | ✓      | ✓                          |        | ✓           |        |
| Nature Reviews Microbiology                    | 34.209               | ✓            |        | ✓                          |        | ✓           |        |
| The Lancet Oncology                            | 33.752               |              |        |                            | ✓      |             | ✓      |
| Journal Of Clinical Oncology                   | 32.956               |              |        |                            | ✓      |             | ✓      |
| The BMJ                                        | 30.223               |              |        |                            |        |             | ✓      |

283 **DISCUSSION**

284 We retrospectively analysed the gender parity of authors in six categories of authorship of scientific  
 285 publications that were published over a five-year period. Our analysis shows that the number of  
 286 female authors were underrepresented across all six categories of authorship [10,39,40].

287 In the first author category the proportions of female authors and male authors were within the 40%-  
 288 60% “gender balance zone” [6]. The greatest gender imbalance was observed in the last author  
 289 category where ‘female only’ authors comprised only 23%. Nonetheless, this proportion is higher than  
 290 other studies reporting similar analyses [11,13,24].

291 To the best of our knowledge, this study presents the first analysis of joint authorship in three  
 292 categories. Secondly, it demonstrates underrepresentation in female only authors in six categories of  
 293 scientific authorship [41]. Thirdly, the analysis highlights gender inequity with female  
 294 underrepresentation in prestigious authorship positions compared to male in biomedical research.  
 295 This is consistent with other fields including: epilepsy, lung cancer, dermatology, eating disorders and  
 296 in medicine in general [14,16,42–44].

297 This study extends understanding of gender-based trends in scientific authorship (Figure 2) by showing  
 298 encouraging incremental changes in gender parity in authorship in a biomedical research setting.  
 299 Previous research examined the gender gap in authorship within the medical literature reporting an  
 300 upward trend for female first authors from 6% in 1970 to 29% in 2004 and female last authors from  
 301 4% in 1970 to 19% 2004. However, it was limited to US based institutions [12]. A similar UK based  
 302 study covering the same period (i.e. 1970-2004) also showed upward trends for female first authors

1  
2  
3 303 increasing from 11% in 1970 to 37% in 2004 and female last authors from 12% in 1970 to 17% in 2004  
4 304 [24]. In addition, a recent study by Filardo et al. [13] examined the prevalence of female first  
5 305 authorship of original research published in six high impact general medical journals between  
6 306 February 1994 and June 2014 revealed that the adjusted probability of an article having a female first  
7 307 authorship increased significantly from 27% in 1994 to 37% in 2014 [13]. However, despite the  
8 308 proportion of female first authors varied greatly by journal, men were generally more likely to be first  
9 309 authors than women [13]. Compared to previous studies mentioned above, our study provides  
10 310 evidence of higher and increasing gender equity in the first authors, last authors and other four  
11 311 categories of scientific authorship in biomedical research (Table 2).

12 312 Our study identified a strong association between same gender and authorship types showing if the  
13 313 first author of a publication was male, it was highly likely that the first corresponding author of the  
14 314 same publication would also be male. Similarly, the likelihood of the first author being female was  
15 315 higher, if the first corresponding author was also female [45]. Likewise, there appeared to be a  
16 316 significant association of male and female last authors with the respective gender of first authors.  
17 317 Previous research has highlighted males and females were more likely to be first authors on papers if  
18 318 the last authors were of the same gender; however, these were not conducted in a translational  
19 319 research setting [20,46–48]. There was also a strong association of male and female last authors with  
20 320 the respective gender of corresponding authors [45].

21 321 However, due to the differences in gender equity between different research areas and medical  
22 322 specialties, where a centre-specific mix of research themes is likely to influence gender equity in  
23 323 scientific authorship, it is difficult to make direct comparisons across the literature.

24 324 Overall, our results build an important evidence base in biomedical research settings concerning  
25 325 gender parity and support the findings from previous studies where analysis of scientific authorship  
26 326 by gender has been used as an important marker of gender equity [12,24,49–51].

27 327 We also studied differences between male and female authors in publishing articles in high impact  
28 328 journals. Our results revealed that male first corresponding authors were more likely to publish  
29 329 articles in high impact factor journals compared to female first corresponding authors (Table 5). These  
30 330 findings suggest that female first corresponding authors are less likely to publish articles in high impact  
31 331 journals. We also found that male and female first and last authors were more likely to publish articles  
32 332 in journals with impact factors that were not statistically significantly different (Table 6, Figure 3). Our  
33 333 findings show that both the male and the female biomedical researchers publish articles at prestigious  
34 334 authorship positions i.e. first and last authors in journals with high impact factors. Our findings are  
35 335 contrary to the findings of earlier research by Bendels et al who reported that female researchers  
36 336 were less likely to publish in high impact factor journals at prestigious authorship positions [49].  
37 337 Dissimilarities in the findings of our study and the study by Bendels et al [49] could be due to the  
38 338 differences in journals analysed, research disciplines included and the time period covered. Our  
39 339 analysis included a wide range of journals in which researchers affiliated with the NIHR Oxford BRC  
40 340 published translational research from April 2012 to March 2017 while Bendels et al analysed only  
41 341 Nature Index journals in four disciplines i.e. Life Science, Multidisciplinary, Earth and Environmental  
42 342 and Chemistry covering publication period from January 2008 to May 2016 [49].

### 343 ***Implications for policy and practice***

344 While NIHR BRCs routinely collect bibliometric data on publications arising from the NIHR-funded  
345 research, and report to the NIHR (the funder), to the best of our knowledge, this data is not routinely  
346 analysed by gender. Our study supports the feasibility of using NIHR BRCs funded or supported  
347 research publications for analysing scientific authorship by gender. While retrospective analysis of the  
348 gender of authors in scientific publications is labour-intensive and has limitations, there is an  
349 opportunity to begin to track this prospectively. As more data becomes available, this would enable  
350 longitudinal analysis of scientific authorship by gender, which could be useful for tracking progress  
351 towards gender equity and related issues such as markers of achievement across all NIHR BRCs.

352 In addition, since the acceleration of women's advancement and leadership in translational research  
353 is one of the stated objectives of the NIHR, investigating the extent of gender equity in scientific  
354 authorship may usefully inform strategies to accelerate women's advancement and leadership in  
355 NIHR-funded research. Moreover, bibliometric analyses used by the NIHR to inform competition for  
356 NIHR funding may incorporate the gender dimension into the analysis, which could provide additional  
357 information on the competitiveness for NIHR funding [52,53].

## 358 **CONCLUSION**

359 Our results show that while first authorship is within the 40%-60% gender balance zone, a greater  
360 gender disparity is prevalent in other types of scientific authorship in biomedical research. The  
361 proportion of female authors is significantly lower than the proportion of male authors in all six  
362 categories of authorship included in our analysis. This study also demonstrates the feasibility of  
363 analysing scientific authorship by gender, which could provide useful insight about gender equity in  
364 scientific publications, which may be a useful marker of achievement. Overall, our study demonstrates  
365 that it is feasible to analyse the available bibliometric data on publications arising from NIHR funding  
366 by gender and consider establishing processes for analysing gender equity in scientific authorship over  
367 time. In addition, our study provides evidence that male first corresponding authors are more likely  
368 to publish articles in prestigious journals with high impact factor while both male and female authors  
369 at first and last authorship positions publish articles in journals with almost equal impact factor.

## 370 **Contributors**

371 LDE conceived the study. RD and MJM coded the data. SGSS analysed the data and created  
372 visualisations. RD and SGSS drafted the manuscript. PVO contributed to the conception of the study  
373 and co-wrote parts of the manuscript. CRH and OC participated in data collection. VK, LRH, and AMB  
374 contributed to the conception of the study, facilitated access to the publications and coordinated the  
375 study. All authors read, contributed to and approved the final manuscript.

## 376 **Funding**

377 This study is funded by the European Union's Horizon 2020 research and innovation programme  
378 award STARBIOS2 under grant agreement No. 709517 and by the National Institute for Health  
379 Research (NIHR) Oxford Biomedical Research Centre, grant BRC-1215-20008 to the Oxford University

380 Hospitals NHS Foundation Trust and the University of Oxford. The views expressed are those of the  
381 authors and not necessarily those of the NHS, the NIHR, or the Department of Health and Social Care.

## 382 **Competing interests**

383 VK is Chief Operating Officer and LRH is Clinical Research Manager at the National Institute for Health  
384 Research (NIHR) Biomedical Research Centre, Oxford. AMB is a senior medical science advisor and co-  
385 founder of Brainomix, a company that develops electronic ASPECTS (e-ASPECTS), an automated  
386 method to evaluate ASPECTS in stroke patients. MJM, LDE and PVO were funded by STARBIOS2 and  
387 the National Institute for Health Research (NIHR) Oxford Biomedical Research Centre (BRC). PVO is a  
388 member of the NIHR Advisory Group on Equality, Diversity, and Inclusion, a member of the European  
389 Association of Science Editors Gender Policy Committee, and a member of the Athena SWAN Self-  
390 Assessment Team of the Radcliffe Department of Medicine, University of Oxford. The other authors  
391 declare no competing interests.

## 392 **Ethics**

393 The University of Oxford Clinical Trials and Research Governance Team reviewed the study and  
394 deemed it exempt from full ethics review on the grounds that it falls outside of the Governance  
395 Arrangements for Research Ethics Committees (GAfREC), which stipulate which publications are  
396 required to have ethics review. A wider programme of research on the activities of the NIHR Oxford  
397 Biomedical Research Centre from 2017 to 2022 received ethics clearance through the University of  
398 Oxford Central University Research Ethics Committee (R51801/ RE001), the Health Research Authority  
399 (IRAS ID 228049) and the Oxford University Hospitals NHS Foundation Trust Management (PID 12779).

## 400 **Acknowledgements**

401 The authors wish to thank the editors and reviewers who provided constructive feedback and  
402 suggestions which improved this work. The authors also wish to thank Professor Helen McShane for  
403 reviewing the initial draft manuscript and making comments and suggestions for improving it.

## 404 **Patient consent for publication**

405 Not required.

## 406 **Data sharing statement**

407 No additional data available.

## 408 **REFERENCES**

- 409 1 Colizzi V, Mezzana D, Ovseiko P V., *et al.* Structural transformation to attain responsible  
410 BIOSciences (STARBIOS2): Protocol for a horizon 2020 funded European multicenter project to  
411 promote responsible research and innovation. *Journal of Medical Internet Research* 2019;**21**.  
412 doi:10.2196/11745



- 1  
2  
3 413 2 Elster D, Barendziak T, Birkholz J. Towards a Sustainable and Open Science: Recommendations  
4 414 for Enhancing Responsible Research and Innovation in the Biosciences at the University of  
5 415 Bremen. 2019.
- 6  
7  
8 416 3 European Commission. Indicators for promoting and monitoring Responsible Research and  
9 417 Innovation. Report from the Expert Group on Policy Indicators for Responsible Research and  
10 418 Innovation. 2015.
- 11  
12 419 4 European Commission. DIRECTIVE OF THE EUROPEAN PARLIAMENT AND OF THE COUNCIL on  
13 420 improving the gender balance among non-executive directors of companies listed on stock  
14 421 exchanges and related measures. 2012.
- 15  
16 422 5 European Commission. Report on Equality between Women and Men in the European Union.  
17 423 2019;;1–78. doi:10.2838/776419
- 18  
19 424 6 Kuhlmann E, Ovseiko P V., Kurmeyer C, *et al.* Closing the gender leadership gap: A multi-centre  
20 425 cross-country comparison of women in management and leadership in academic health centres  
21 426 in the European Union. *Human Resources for Health* 2017;**15**:1–7. doi:10.1186/s12960-016-  
22 427 0175-y
- 23  
24  
25 428 7 European Institute for Gender Equality. Gender parity.  
26 429 2020.<https://eige.europa.eu/thesaurus/terms/1195> (accessed 19 Feb 2020).
- 27  
28 430 8 Rexrode KM. The gender gap in first authorship of research papers. *The BMJ* 2016;**1130**:1–2.  
29 431 doi:10.1136/bmj.i1130
- 30  
31 432 9 Bloch C, Graversen EK, Pedersen HS. Competitive Research Grants and Their Impact on Career  
32 433 Performance. *Minerva* 2014;**52**:77–96.
- 33  
34 434 10 Bendels, M, Muller, R, Brueggmann, D, Groneberg D. Gender disparities in high-quality research  
35 435 revealed by Nature Index journals. *PLoS ONE* 2018;**13**:1–21.
- 36  
37  
38 436 11 Jefferson L, Bloor K, Maynard A. Women in medicine: Historical perspectives and recent trends.  
39 437 *British Medical Bulletin* 2015;**114**:5–15. doi:10.1093/bmb/ldv007
- 40  
41 438 12 Jagsi, R, Guancial, E, Worobey, C, Henault, L, Chang, Y, Starr, R, Tarbell, N, Hylek E. The “Gender  
42 439 Gap” in Authorship of Academic Medical Literature — A 35-Year Perspective. *The New England  
43 440 Journal of Medicine* 2006;**355**:281–7.
- 44  
45 441 13 Filardo G, Graca B, Sass DM, *et al.* Trends and comparison of female first authorship in high  
46 442 impact medical journals : observational study ( 1994-2014 ). *The BMJ* 2016;**352**:1–8.  
47 443 doi:10.1136/bmj.i847
- 48  
49 444 14 Bendels, Michael, Wanke, Eileen, Schoffel, Norman, Bauer, J, Quarcoo, David and Groneberg D.  
50 445 Gender equality in academic research on epilepsy — a study on scientific authorships. *Epilepsia*  
51 446 2017;**58**:1794–802. doi:10.1111/epi.13873
- 52  
53  
54 447 15 Bendels MHK, Brüggmann D, Schöffel N, *et al.* Gendermetrics of cancer research : results from a  
55 448 global analysis on lung cancer. *Oncotarget* 2017;;1–11.
- 56  
57  
58  
59  
60

- 1  
2  
3 449 16 Bendels MHK, Dietz MC, Brüggmann D, *et al.* Gender disparities in high-quality dermatology  
4 450 research : a descriptive bibliometric study on scientific authorships. *BMJ Open* 2018;**8**:1–11.  
5 451 doi:10.1136/bmjopen-2017-020089  
6  
7 452 17 Bendels MHKK, Brüggmann D, Schöffel N, *et al.* Gendermetrics of cancer research: Results from  
8 453 a global analysis on prostate cancer. *Oncotarget* 2018;**9**:19640–9.  
9 454 doi:10.18632/oncotarget.24716  
10  
11 455 18 Sing DC, Jain D, Ouyang D. Gender trends in authorship of spine-related academic literature — a  
12 456 39-year perspective. *The Spine Journal* 2017;**17**:1749–54. doi:10.1016/j.spinee.2017.06.041  
13  
14 457 19 Schisterman EF, Swanson CW, Lu Y, *et al.* The changing face of epidemiology: gender disparities  
15 458 in citations? *Epidemiology* 2017;**28**:159–68. doi:10.1097/EDE.0000000000000593.The  
16  
17 459 20 Piper CL, Scheel JR, Lee CI, *et al.* Gender trends in radiology authorship: A 35-year analysis.  
18 460 *American Journal of Roentgenology* 2016;**206**:3–7. doi:10.2214/AJR.15.15116  
19  
20 461 21 Mueller CM, Gaudilliere DK, Kin C, *et al.* Gender disparities in scholarly productivity of US  
21 462 academic surgeons. *Journal of Surgical Research* 2016;**203**:28–33. doi:10.1016/j.jss.2016.03.060  
22  
23 463 22 Long MT, Leszczynski A, Thompson KD, *et al.* Female authorship in major academic  
24 464 gastroenterology journals: A look over 20 years. *Gastrointestinal Endoscopy* 2015;**81**:1440-  
25 465 1447.e3. doi:10.1016/j.gie.2015.01.032  
26  
27 466 23 Fishman M, Williams WA, Goodman DM, *et al.* Gender Differences in the Authorship of Original  
28 467 Research in Pediatric Journals, 2001-2016. *Journal of Pediatrics* 2017;**191**:244-249.e1.  
29 468 doi:10.1016/j.jpeds.2017.08.044  
30  
31 469 24 Sidhu R, Rajashekhar P, Lavin VL, *et al.* The gender imbalance in academic medicine: A study of  
32 470 female authorship in the United Kingdom. *Journal of the Royal Society of Medicine*  
33 471 2009;**102**:337–42. doi:10.1258/jrsm.2009.080378  
34  
35 472 25 Sing DC, Jain D, Ouyang D. Gender trends in authorship of spine-related academic literature—a  
36 473 39-year perspective. *Spine Journal* 2017;**17**:1749–54. doi:10.1016/j.spinee.2017.06.041  
37  
38 474 26 Ovseiko P V., Chapple A, Edmunds LD, *et al.* Advancing gender equality through the Athena  
39 475 SWAN Charter for Women in Science: An exploratory study of women’s and men’s perceptions.  
40 476 *Health Research Policy and Systems* 2017;**15**:1–13. doi:10.1186/s12961-017-0177-9  
41  
42 477 27 Ovseiko P V., Pololi LH, Edmunds LD, *et al.* Creating a more supportive and inclusive university  
43 478 culture: a mixed-methods interdisciplinary comparative analysis of medical and social sciences  
44 479 at the University of Oxford. *Interdisciplinary Science Reviews* 2019;**44**:166–91.  
45 480 doi:10.1080/03080188.2019.1603880  
46  
47 481 28 Schmidt EK, Ovseiko P V, Henderson LR, *et al.* Understanding the Athena SWAN award scheme  
48 482 for gender equality as a complex social intervention in a complex system: analysis of Silver  
49 483 award action plans in a comparative European perspective. *bioRxiv* 2019;:555482.  
50 484 doi:10.1101/555482  
51  
52 485 29 Ovseiko, PV, Edmunds, LD, Pololi, LH et al. Markers of achievement for assessing and  
53 486 monitoring gender equity in translational research organisations : a rationale and study  
54 487 protocol. *BMJ Open* 2016;**6**:1–11. doi:10.1136/bmjopen-2015-009022  
55  
56  
57  
58  
59  
60

- 1  
2  
3 488 30 NIHR Oxford BRC. About the NIHR Oxford Biomedical Research Centre.  
4 489 2019.<https://oxfordbrc.nihr.ac.uk/about-us-intro/> (accessed 19 Dec 2019).  
5
- 6 490 31 Greenhalgh T, Ovseiko P V., Fahy N, *et al.* Maximising value from a United Kingdom Biomedical  
7 491 Research Centre: study protocol. *Health research policy and systems* 2017;**15**:70.  
8 492 doi:10.1186/s12961-017-0237-1
- 9  
10  
11 493 32 Gunashekar S, Parks S, Calero-Medina C, *et al.* Bilbliometric analysis of highly cited publications  
12 494 of biomedical and health research in England, 2004--2013. *Bilbliometric analysis of highly cited*  
13 495 *publications of biomedical and health research in England, 2004--2013* 2016;**83**.  
14 496 doi:<https://doi.org/10.7249/RR1363>
- 15  
16 497 33 Gunashekar S, Wooding S, Guthrie S. How do NIHR peer review panels use bibliometric  
17 498 information to support their decisions? *Scientometrics* 2017;**112**:1813–35. doi:10.1007/s11192-  
18 499 017-2417-8
- 19  
20  
21 500 34 Tschardt T, Hochberg ME, Rand TA, *et al.* Author sequence and credit for contributions in  
22 501 multiauthored publications. *PLoS Biology* 2007;**5**:0013–4. doi:10.1371/journal.pbio.0050018
- 23  
24 502 35 Wren JD, Kozak KZ, Johnson KR, *et al.* The write position. A survey of perceived contributions to  
25 503 papers based on byline position and number of authors. *EMBO Reports* 2007;**8**:988–91.  
26 504 doi:10.1038/sj.embor.7401095
- 27  
28 505 36 ICMJE. Defining the Role of Authors and Contributors.  
29 506 2019.[http://www.icmje.org/recommendations/browse/roles-and-responsibilities/defining-the-](http://www.icmje.org/recommendations/browse/roles-and-responsibilities/defining-the-role-of-authors-and-contributors.html)  
30 507 [role-of-authors-and-contributors.html](http://www.icmje.org/recommendations/browse/roles-and-responsibilities/defining-the-role-of-authors-and-contributors.html) (accessed 23 Dec 2019).
- 31  
32  
33 508 37 Slezák P, Bokes P, Námer P, *et al.* Microsoft Excel add-in for the statistical analysis of  
34 509 contingency tables. *Int J Innovation Educ Res* 2014;**2**:90–100. doi:10.31686/ijer.vol2.iss5.188
- 35  
36 510 38 Spitzer M, Wildenhain J, Rappsilber J, *et al.* BoxPlotR: a web tool for generation of box plots. *Nat*  
37 511 *Methods* 2014;**11**:121–2. doi:10.1038/nmeth.2811
- 38  
39 512 39 Holman L, Stuart-fox D, Hauser CE. The gender gap in science: How long until women are equally  
40 513 represented? *PLoS Biology* 2018;**16**:1–20. doi:10.1371/journal.pbio.2004956
- 41  
42 514 40 UNESCO. Women in Science. Fact Sheet. 2018.
- 43  
44 515 41 Broderick NA, Casadevall A. Gender inequalities among authors who contributed equally. *eLife*  
45 516 2019;**8**:1–11. doi:10.7554/eLife.36399
- 46  
47 517 42 Bendels MHK, Bruggmann D SN *et al.* Gendermetrics of cancer research: results from a global  
48 518 analysis on lung cancer. *Oncotarget* 2017;**8**:1–11.
- 49  
50  
51 519 43 Strand M, Bulik CM. Trends in female authorship in research papers on eating disorders: 20-year  
52 520 bibliometric study. *BJPsycho Open* 2018;**4**:39–46. doi:10.1192/bjo.2017.8
- 53  
54 521 44 Gayet-Ageron A, Poncet A, Perneger T. Comparison of the contributions of female and male  
55 522 authors to medical research in 2000 and 2015: A cross-sectional study. *BMJ Open* 2019;**9**:1–8.  
56 523 doi:10.1136/bmjopen-2018-024436
- 57  
58  
59  
60

- 1  
2  
3 524 45 Ouyang, D, Harrington, RA., Rodriguez F. Association Between Female Corresponding Authors  
4 525 and Female Co-Authors in Top Contemporary Cardiovascular Medicine Journals. *Circulation*  
5 526 *American Heart Association* 2019;**139**:1127–9. doi:10.1161/CIRCULATIONAHA.118.037763  
6  
7 527 46 Fox CW, Burns CS, Muncy AD, *et al.* Gender differences in patterns of authorship do not affect  
8 528 peer review outcomes at an ecology journal. *Functional Ecology* 2016;**30**:126–39.  
9 529 doi:10.1111/1365-2435.12587  
10  
11 530 47 Salerno PE, Páez-Vacas M, Guayasamin JM, *et al.* Male principal investigators (almost) don't  
12 531 publish with women in ecology and zoology. *PLoS ONE* 2019;**14**:1–14.  
13 532 doi:10.1371/journal.pone.0218598  
14  
15 533 48 Edwards HA, Schroeder J, Dugdale HL. Correction: Gender differences in authorships are not  
16 534 associated with publication bias in an evolutionary journal(PLoS ONE (2019)13:8  
17 535 (e0201725)Doi:10.1371/journal.pone.0201725). *PLoS ONE* 2019;**14**:1–16.  
18 536 doi:10.1371/journal.pone.0217251  
19  
20 537 49 Bendels MHK, Müller R, Brueggmann D, *et al.* Gender disparities in high-quality research  
21 538 revealed by nature index journals. *PLoS ONE* 2018;**13**:1–21. doi:10.1371/journal.pone.0189136  
22  
23 539 50 Feramisco JD, Leitenberger JJ, Redfern SI, *et al.* A gender gap in the dermatology literature ?  
24 540 Cross-sectional analysis of manuscript authorship trends in dermatology journals during 3  
25 541 decades. *Journal of American Dermatology* 2009;**60**:63–9. doi:10.1016/j.jaad.2008.06.044  
26  
27 542 51 Bhattacharyya N, Shapiro NL. Increased Female Authorship in Otolaryngology Over the Past  
28 543 Three Decades. *The Laryngoscope* 2000;**110**:358–61. doi:10.1097/00005537-200003000-00005  
29  
30 544 52 Van Leeuwen T, Hoorens S, Grant J. Using bibliometrics to support the procurement of NIHR  
31 545 biomedical research centres in England. *Research Evaluation* 2009;**18**:71–82.  
32 546 doi:10.3152/095820209X414178  
33  
34 547 53 Leeuwen T Van, Grant J. Bibliometric analysis of highly cited publications of health research in  
35 548 England, 1995-2004. 2007.

## 549 Additional files list

- 550 **Figure 1** Publication analysis workflow.  
551 The workflow shows the process of extracting data according to gender from six types of authorship.  
552 **Figure 2** Yearly trends in scientific authorship by gender (male and female), April 2012 - March 2017.  
553 This plot represents the yearly variation of the proportion of male and female authors according to six  
554 types of authorship between the years of publication/acceptance from 2012 to 2017.  
555 **Figure 3** Impact factor of journals and authorship categories by gender.  
556 This figure shows the boxplots of impact factors of journals in which male and female authors  
557 published articles.

1  
2  
3  
4  
5  
6  
7  
8  
9  
10  
11  
12  
13  
14  
15  
16  
17  
18  
19  
20  
21  
22  
23  
24  
25  
26  
27  
28  
29  
30  
31  
32  
33  
34  
35  
36  
37  
38  
39  
40  
41  
42  
43  
44  
45  
46  
47  
48  
49  
50  
51  
52  
53  
54  
55  
56  
57  
58  
59  
60

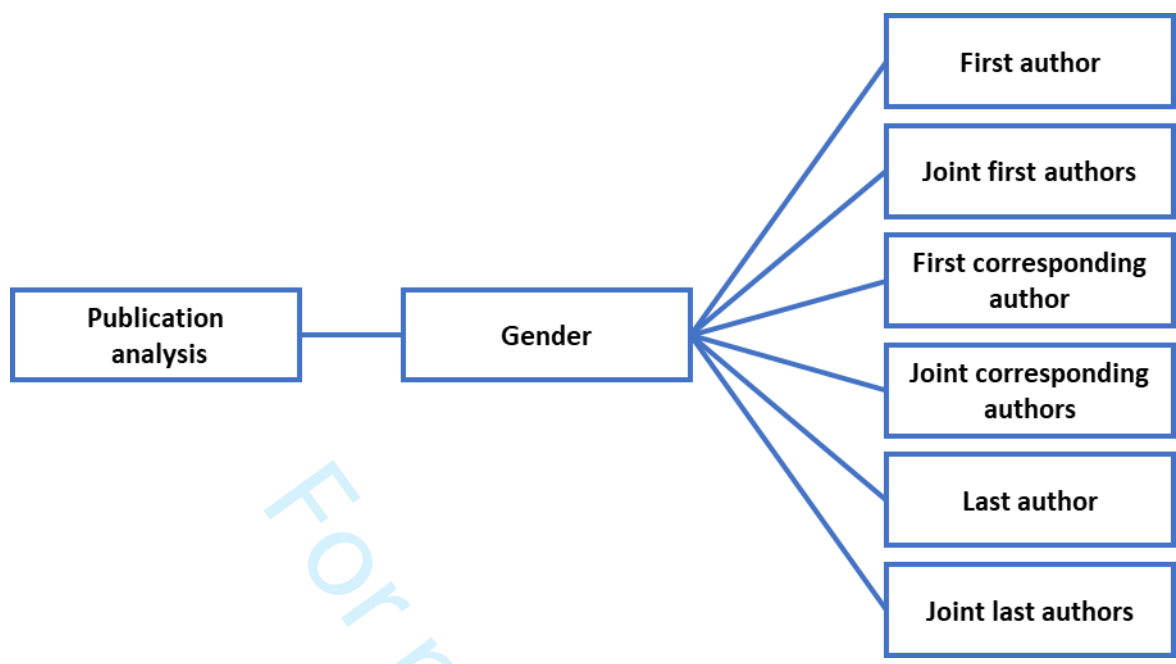

Figure 1 Publication analysis workflow.

For peer review only

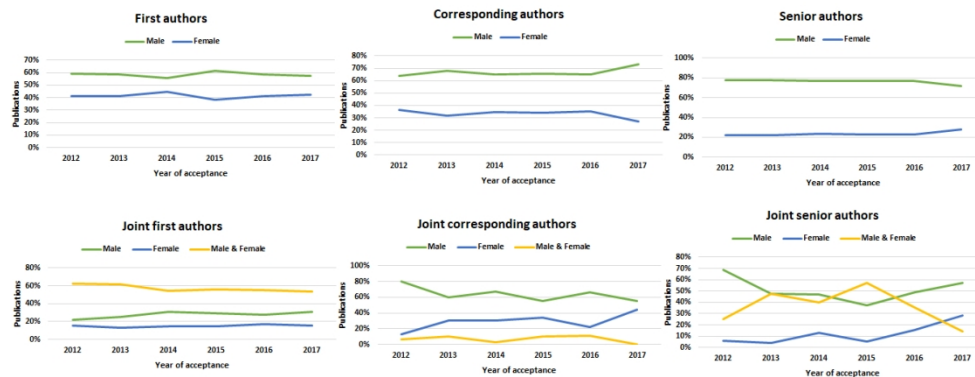

364x146mm (96 x 96 DPI)

1  
2  
3  
4  
5  
6  
7  
8  
9  
10  
11  
12  
13  
14  
15  
16  
17  
18  
19  
20  
21  
22  
23  
24  
25  
26  
27  
28  
29  
30  
31  
32  
33  
34  
35  
36  
37  
38  
39  
40  
41  
42  
43  
44  
45  
46  
47  
48  
49  
50  
51  
52  
53  
54  
55  
56  
57  
58  
59  
60

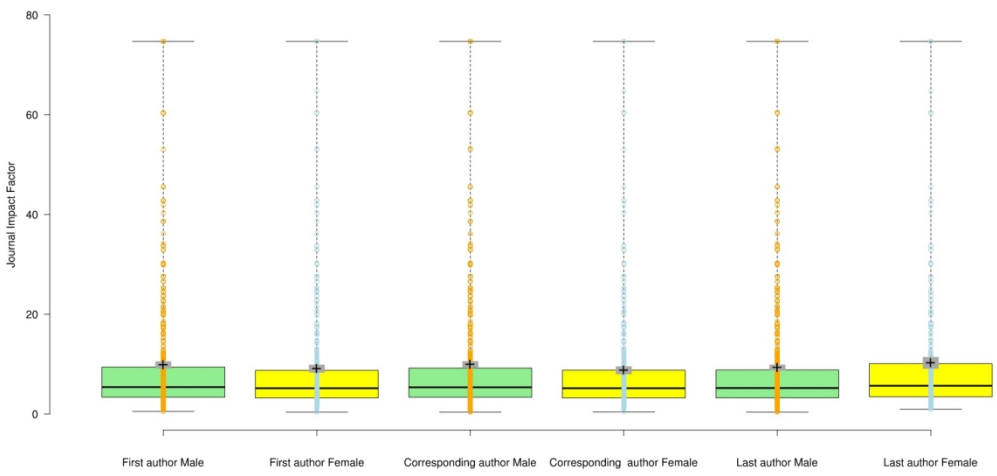

**STROBE Statement**

## Checklist of items that should be included in reports of observational studies

1  
2  
3  
4  
5  
6  
7  
8  
9  
10  
11  
12  
13  
14  
15  
16  
17  
18  
19  
20  
21  
22  
23  
24  
25  
26  
27  
28  
29  
30  
31  
32  
33  
34  
35  
36  
37  
38  
39  
40  
41  
42  
43  
44  
45  
46  
47

| Section/Topic             | Item No | Recommendation                                                                                                                                                                                  | Reported on Page No |
|---------------------------|---------|-------------------------------------------------------------------------------------------------------------------------------------------------------------------------------------------------|---------------------|
| <b>Title and abstract</b> | 1       | (a) Indicate the study's design with a commonly used term in the title or the abstract                                                                                                          | Pages 1-2           |
|                           |         | (b) Provide in the abstract an informative and balanced summary of what was done and what was found                                                                                             | Page 2              |
| <b>Introduction</b>       |         |                                                                                                                                                                                                 |                     |
| Background/rationale      | 2       | Explain the scientific background and rationale for the investigation being reported                                                                                                            | Pages 4-5           |
| Objectives                | 3       | State specific objectives, including any pre-specified hypotheses                                                                                                                               | Pages 4-5           |
| <b>Methods</b>            |         |                                                                                                                                                                                                 |                     |
| Study design              | 4       | Present key elements of study design early in the paper                                                                                                                                         | Page 5              |
| Setting                   | 5       | Describe the setting, locations, and relevant dates, including periods of recruitment, exposure, follow-up, and data collection                                                                 | Pages 5-6           |
| Participants              | 6       | (a) <i>Cohort study</i> —Give the eligibility criteria, and the sources and methods of selection of participants. Describe methods of follow-up: N/A                                            |                     |
|                           |         | <i>Case-control study</i> —Give the eligibility criteria, and the sources and methods of case ascertainment and control selection. Give the rationale for the choice of cases and controls: N/A |                     |
|                           |         | <i>Cross-sectional study</i> —Give the eligibility criteria, and the sources and methods of selection of participants: Pages 5-6                                                                |                     |
| Variables                 | 7       | (b) <i>Cohort study</i> —For matched studies, give matching criteria and number of exposed and unexposed                                                                                        | N/A                 |
|                           |         | <i>Case-control study</i> —For matched studies, give matching criteria and the number of controls per case                                                                                      | N/A                 |
|                           |         | Clearly define all outcomes, exposures, predictors, potential confounders, and effect modifiers. Give diagnostic criteria, if applicable                                                        | Page 6              |
| Data sources/measurement  | 8*      | For each variable of interest, give sources of data and details of methods of assessment (measurement). Describe comparability of assessment methods if there is more than one group            | Page 6              |
| Bias                      | 9       | Describe any efforts to address potential sources of bias                                                                                                                                       | Page 3              |
| Study size                | 10      | Explain how the study size was arrived at                                                                                                                                                       | Page 6              |
| Quantitative variables    | 11      | Explain how quantitative variables were handled in the analyses. If applicable, describe which groupings were chosen and why                                                                    | Page 6              |
| Statistical methods       | 12      | (a) Describe all statistical methods, including those used to control for confounding                                                                                                           | Page 6              |
|                           |         | (b) Describe any methods used to examine subgroups and interactions                                                                                                                             | Page 6              |
|                           |         | (c) Explain how missing data were addressed                                                                                                                                                     | N/A                 |
|                           |         | (d) <i>Cohort study</i> —If applicable, explain how loss to follow-up was addressed                                                                                                             |                     |
|                           |         | <i>Case-control study</i> —If applicable, explain how matching of cases and controls was addressed                                                                                              | N/A                 |
|                           |         | <i>Cross-sectional study</i> —If applicable, describe analytical methods taking account of sampling strategy                                                                                    |                     |
|                           |         | (e) Describe any sensitivity analyses                                                                                                                                                           | N/A                 |



| Section/Topic     | Item No | Recommendation                                                                                                                                                                                                  | Reported on Page No                                                                           |
|-------------------|---------|-----------------------------------------------------------------------------------------------------------------------------------------------------------------------------------------------------------------|-----------------------------------------------------------------------------------------------|
| <b>Results</b>    |         |                                                                                                                                                                                                                 |                                                                                               |
| Participants      | 13*     | (a) Report numbers of individuals at each stage of study—eg numbers potentially eligible, examined for eligibility, confirmed eligible, included in the study, completing follow-up, and analysed               | No participants were used in this study. Scientific publications were used only.<br>Pages 6-9 |
|                   |         | (b) Give reasons for non-participation at each stage                                                                                                                                                            | N/A                                                                                           |
|                   |         | (c) Consider use of a flow diagram                                                                                                                                                                              | Supplementary file 1                                                                          |
| Descriptive data  | 14*     | (a) Give characteristics of study participants (eg demographic, clinical, social) and information on exposures and potential confounders                                                                        | Table 1 on page 7 and Table 2 on page 8                                                       |
|                   |         | (b) Indicate number of participants with missing data for each variable of interest                                                                                                                             | N/A                                                                                           |
|                   |         | (c) <i>Cohort study</i> —Summarise follow-up time (eg, average and total amount)                                                                                                                                | N/A                                                                                           |
| Outcome data      | 15*     | <i>Cohort study</i> —Report numbers of outcome events or summary measures over time                                                                                                                             | N/A                                                                                           |
|                   |         | <i>Case-control study</i> —Report numbers in each exposure category, or summary measures of exposure                                                                                                            | N/A                                                                                           |
|                   |         | <i>Cross-sectional study</i> —Report numbers of outcome events or summary measures                                                                                                                              | Pages 7-9                                                                                     |
| Main results      | 16      | (a) Give unadjusted estimates and, if applicable, confounder-adjusted estimates and their precision (eg, 95% confidence interval).<br>Make clear which confounders were adjusted for and why they were included | N/A                                                                                           |
|                   |         | (b) Report category boundaries when continuous variables were categorized                                                                                                                                       | N/A                                                                                           |
|                   |         | (c) If relevant, consider translating estimates of relative risk into absolute risk for a meaningful time period                                                                                                | N/A                                                                                           |
| Other analyses    | 17      | Report other analyses done—eg analyses of subgroups and interactions, and sensitivity analyses                                                                                                                  | Pages 8-9                                                                                     |
| <b>Discussion</b> |         |                                                                                                                                                                                                                 |                                                                                               |
| Key results       | 18      | Summarise key results with reference to study objectives                                                                                                                                                        | Page 9                                                                                        |
| Limitations       | 19      | Discuss limitations of the study, taking into account sources of potential bias or imprecision. Discuss both direction and magnitude of any potential bias                                                      | Pages 3 & 10                                                                                  |

|   |                          |    |                                                                                                                                                                            |         |
|---|--------------------------|----|----------------------------------------------------------------------------------------------------------------------------------------------------------------------------|---------|
| 1 | Interpretation           | 20 | Give a cautious overall interpretation of results considering objectives, limitations, multiplicity of analyses, results from similar studies, and other relevant evidence | Page 10 |
| 2 |                          |    |                                                                                                                                                                            |         |
| 3 | Generalisability         | 21 | Discuss the generalisability (external validity) of the study results                                                                                                      | Page 10 |
| 4 | <b>Other Information</b> |    |                                                                                                                                                                            |         |
| 5 |                          |    |                                                                                                                                                                            |         |
| 6 | Funding                  | 22 | Give the source of funding and the role of the funders for the present study and, if applicable, for the original study on which the present article is based              | Page 11 |
| 7 |                          |    |                                                                                                                                                                            |         |

8 *\*Give information separately for cases and controls in case-control studies and, if applicable, for exposed and unexposed groups in cohort and cross-sectional studies.*

9 **Note:** An Explanation and Elaboration article discusses each checklist item and gives methodological background and published examples of transparent reporting. The STROBE checklist is  
 10 best used in conjunction with this article (freely available on the Web sites of PLoS Medicine at <http://www.plosmedicine.org/>, Annals of Internal Medicine at <http://www.annals.org/>, and  
 11 Epidemiology at <http://www.epidem.com/>). Information on the STROBE Initiative is available at [www.strobe-statement.org](http://www.strobe-statement.org).

12

13

14

15

16

17

18

19

20

21

22

23

24

25

26

27

28

29

30

31

32

33

34

35

36

37

38

39

40

41

42

43

44

45

46

47

# BMJ Open

## Gender parity in scientific authorship in a National Institute for Health Research Biomedical Research Centre: A bibliometric analysis

|                                 |                                                                                                                                                                                                                                                                                                                                                                                                                                                                                                                                                                                                                                                                                                                                                                                                                                                                                                                                                                                                             |
|---------------------------------|-------------------------------------------------------------------------------------------------------------------------------------------------------------------------------------------------------------------------------------------------------------------------------------------------------------------------------------------------------------------------------------------------------------------------------------------------------------------------------------------------------------------------------------------------------------------------------------------------------------------------------------------------------------------------------------------------------------------------------------------------------------------------------------------------------------------------------------------------------------------------------------------------------------------------------------------------------------------------------------------------------------|
| Journal:                        | <i>BMJ Open</i>                                                                                                                                                                                                                                                                                                                                                                                                                                                                                                                                                                                                                                                                                                                                                                                                                                                                                                                                                                                             |
| Manuscript ID                   | bmjopen-2020-037935.R2                                                                                                                                                                                                                                                                                                                                                                                                                                                                                                                                                                                                                                                                                                                                                                                                                                                                                                                                                                                      |
| Article Type:                   | Original research                                                                                                                                                                                                                                                                                                                                                                                                                                                                                                                                                                                                                                                                                                                                                                                                                                                                                                                                                                                           |
| Date Submitted by the Author:   | 08-Dec-2020                                                                                                                                                                                                                                                                                                                                                                                                                                                                                                                                                                                                                                                                                                                                                                                                                                                                                                                                                                                                 |
| Complete List of Authors:       | Shah, Syed Ghulam Sarwar; Oxford University Hospitals NHS Foundation Trust, NIHR Oxford Biomedical Research Centre; University of Oxford, Radcliffe Department of Medicine<br>Dam, Rinita; University of Oxford, Radcliffe Department of Medicine<br>Milano, Maria; University of Oxford Medical Sciences Division, Radcliffe Department of Medicine<br>Edmunds , Laurel ; University of Oxford Medical Sciences Division, Radcliffe Department of Medicine<br>Henderson, Lorna; Oxford University Hospitals NHS Foundation Trust, NIHR Oxford Biomedical Research Centre<br>Hartley, Catherine; Bodleian Health Care Libraries<br>Coxall, Owen; Bodleian Health Care Libraries<br>Ovseiko, Pavel; University of Oxford Medical Sciences Division, Radcliffe Department of Medicine<br>Buchan, Alastair; University of Oxford Medical Sciences Division, Radcliffe Department of Medicine<br>Kiparoglou, Vasiliki; Oxford University Hospitals NHS Foundation Trust, NIHR Oxford Biomedical Research Centre |
| <b>Primary Subject Heading</b>: | Medical publishing and peer review                                                                                                                                                                                                                                                                                                                                                                                                                                                                                                                                                                                                                                                                                                                                                                                                                                                                                                                                                                          |
| Secondary Subject Heading:      | Ethics, Medical education and training, Medical management, Health informatics                                                                                                                                                                                                                                                                                                                                                                                                                                                                                                                                                                                                                                                                                                                                                                                                                                                                                                                              |
| Keywords:                       | NATURAL SCIENCE DISCIPLINES, EDUCATION & TRAINING (see Medical Education & Training), Change management < HEALTH SERVICES ADMINISTRATION & MANAGEMENT, Health policy < HEALTH SERVICES ADMINISTRATION & MANAGEMENT, Organisational development < HEALTH SERVICES ADMINISTRATION & MANAGEMENT, STATISTICS & RESEARCH METHODS                                                                                                                                                                                                                                                                                                                                                                                                                                                                                                                                                                                                                                                                                 |
|                                 |                                                                                                                                                                                                                                                                                                                                                                                                                                                                                                                                                                                                                                                                                                                                                                                                                                                                                                                                                                                                             |

SCHOLARONE™  
Manuscripts



I, the Submitting Author has the right to grant and does grant on behalf of all authors of the Work (as defined in the below author licence), an exclusive licence and/or a non-exclusive licence for contributions from authors who are: i) UK Crown employees; ii) where BMJ has agreed a CC-BY licence shall apply, and/or iii) in accordance with the terms applicable for US Federal Government officers or employees acting as part of their official duties; on a worldwide, perpetual, irrevocable, royalty-free basis to BMJ Publishing Group Ltd ("BMJ") its licensees and where the relevant Journal is co-owned by BMJ to the co-owners of the Journal, to publish the Work in this journal and any other BMJ products and to exploit all rights, as set out in our [licence](#).

The Submitting Author accepts and understands that any supply made under these terms is made by BMJ to the Submitting Author unless you are acting as an employee on behalf of your employer or a postgraduate student of an affiliated institution which is paying any applicable article publishing charge ("APC") for Open Access articles. Where the Submitting Author wishes to make the Work available on an Open Access basis (and intends to pay the relevant APC), the terms of reuse of such Open Access shall be governed by a Creative Commons licence – details of these licences and which [Creative Commons](#) licence will apply to this Work are set out in our licence referred to above.

Other than as permitted in any relevant BMJ Author's Self Archiving Policies, I confirm this Work has not been accepted for publication elsewhere, is not being considered for publication elsewhere and does not duplicate material already published. I confirm all authors consent to publication of this Work and authorise the granting of this licence.

1  
2  
3  
4 1 **Gender parity in scientific authorship in a National Institute for**  
5 2 **Health Research Biomedical Research Centre: A bibliometric**  
6 3 **analysis**  
7  
8

9 4 Syed Ghulam Sarwar Shah<sup>1,2\*+</sup>, [Sarwar.Shah@ouh.nhs.uk](mailto:Sarwar.Shah@ouh.nhs.uk) \* Corresponding author

11 5 Rinita Dam<sup>1\*+</sup>, [rinita.dam@rdm.ox.ac.uk](mailto:rinita.dam@rdm.ox.ac.uk) \* Corresponding author

13 6 Maria Julia Milano<sup>1</sup>, [colomilano@gmail.com](mailto:colomilano@gmail.com)

15 7 Laurel D Edmunds<sup>1</sup>, [laureledmunds@gmail.com](mailto:laureledmunds@gmail.com)

17 8 Lorna R Henderson<sup>1,2</sup>, [lorna.henderson@ouh.nhs.uk](mailto:lorna.henderson@ouh.nhs.uk)

19 9 Catherine R Hartley<sup>3</sup>, [Catherine.hartley@bodleian.ox.ac.uk](mailto:Catherine.hartley@bodleian.ox.ac.uk)

21 10 Owen Coxall<sup>3</sup>, [owen.coxall@bodleian.ox.ac.uk](mailto:owen.coxall@bodleian.ox.ac.uk)

23 11 Pavel V Ovseiko<sup>1</sup>, [pavel.ovseiko@rdm.ox.ac.uk](mailto:pavel.ovseiko@rdm.ox.ac.uk)

25 12 Alastair M Buchan<sup>1</sup>, [alastair.buchan@medsci.ox.ac.uk](mailto:alastair.buchan@medsci.ox.ac.uk)

27 13 Vasiliki Kiparoglou<sup>2,4</sup>, [vasiliki.kiparoglou@ouh.nhs.uk](mailto:vasiliki.kiparoglou@ouh.nhs.uk)

29 14 **Author institutional addresses**

31 15 <sup>1</sup> Radcliffe Department of Medicine. Medical Sciences Division, University of Oxford, Oxford, United  
32 16 Kingdom.

33 17 <sup>2</sup> National Institute for Health Research Oxford Biomedical Research Centre, Oxford University  
34 18 Hospitals NHS Foundation Trust, Oxford, United Kingdom.

35 19 <sup>3</sup> Bodleian Health Care Libraries, University of Oxford, Oxford, United Kingdom.

36 20 <sup>4</sup>Nuffield Department of Primary Health Care Sciences University of Oxford, Oxford.

37 21 +SGSS and RD contributed equally to this paper and are joint first authors on this work.

38 22 Word count: 5971 (excluding the abstract, highlights and references)

## 23 ABSTRACT

24 **Objective:** Scientific authorship is a vital marker of achievement in academic careers and gender  
25 equity is a key performance metric in research. However, there is little understanding of gender  
26 equity in publications in biomedical research centres funded by the National Institute for Health  
27 Research (NIHR). This study assesses the gender parity in scientific authorship of biomedical  
28 research.

29  
30 **Design:** A descriptive bibliometric study.

31 **Setting:** NIHR Oxford Biomedical Research Centre (BRC).

32 **Data:** Data comprised 2409 publications that were either accepted or published between April 2012  
33 and March 2017. The publications were classified as basic science studies, clinical studies (both trial  
34 and non-trial studies), and other studies (comments, editorials, systematic reviews, reviews,  
35 opinions, book chapters, meeting reports, guidelines and protocols).

36 **Main outcome measures:** Gender of authors, defined as a binary variable comprising either male or  
37 female categories, in six authorship categories: first author, joint first authors, first corresponding  
38 author, joint corresponding authors, last author and joint last authors.

39 **Results:** Publications comprised 39% clinical research (n=939), 27% basic research (n=643), and 34%  
40 other types of research (n=827). The proportion of female authors as first author (41%), first  
41 corresponding authors (34%) and last author (23%) was statistically significantly lower than male  
42 authors in these authorship categories ( $P < 0.001$ ). Of total joint first authors (n=458), joint  
43 corresponding authors (n=169), and joint last authors (n=229), female only authors comprised  
44 statistically significant ( $P < 0.001$ ) smaller proportions i.e. 15% (n=69), 29% (n=49) and 10% (n=23)  
45 respectively, compared to male only authors in these joint authorship categories. There was a  
46 statistically significant association between gender of the last author with gender of the first author  
47 ( $P < 0.001$ ), first corresponding author ( $P < 0.001$ ) and joint last author ( $P < 0.001$ ). The mean journal  
48 impact factor (JIF) was statistically significantly higher when the first corresponding author was male  
49 compared to female (Mean IF: 10.00 vs. 8.77,  $P = 0.020$ ); however, the JIF was not statistically  
50 different when there were male and female authors as first authors and last authors.

51 **Conclusions:** Although the proportion of female authors is significantly lower than the proportion of  
52 male authors in all six categories of authorship analysed, the proportions of male and female last  
53 authors are comparable to their respective proportions as principal investigators in the BRC. These  
54 findings suggest positive trends and the NHIR Oxford BRC doing very well in gender parity in the senior  
55 (last) authorship category. Male corresponding authors are more likely to publish articles in  
56 prestigious journals with high impact factor while both male and female authors at first and last  
57 authorship positions publish articles in equally prestigious journals.

58

59

60

1  
2  
3 61 **Strengths and limitations of this study**  
4

- 5 62 • This is the first study to investigate gender parity in six categories of scientific authorship:  
6 first authors, first corresponding authors, last authors and three joint authorship categories  
7 63 i.e. joint first authors, joint corresponding authors and joint last authors in biomedical  
8 64 research.  
9 65
- 10  
11 66 • The proportions of male and female last (senior) authors are comparable to their respective  
12 67 proportions as principal investigators in this setting, suggesting strong evidence of  
13 68 attainment of gender parity in this category of scientific authorship
- 14  
15  
16 69 • This study offers an important benchmark on gender equity in scientific authorship for other  
17 70 NIHR funded BRCs and organisations in England.
- 18  
19  
20 71 • This study provides evidence that male first corresponding authors are more likely to publish  
21 72 articles in prestigious journals with high impact factor compared to female first  
22 73 corresponding authors, whilst both male and female authors at first and last authorship  
23 74 positions publish articles in prestigious journals with almost equal impact factor.
- 24  
25  
26 75 • The generalisability of these findings may be limited due to differences in medical  
27 76 specialities, research areas, institutional cultures, and levels of support to individual  
28 77 researchers.

29  
30 78 **Keywords:** Responsible Research and Innovation, Gender Equity, Scientific Authorship, National  
31 79 Institute for Health Research, Biomedical Research Centres, Evaluation, Translational Research  
32 80 Organisations, Translational Research, Basic Science Research, Journal Impact Factor, Journal  
33 81 Prestige.  
34  
35  
36  
37  
38  
39  
40  
41  
42  
43  
44  
45  
46  
47  
48  
49  
50  
51  
52  
53  
54  
55  
56  
57  
58  
59  
60

## 82 INTRODUCTION

83 Promoting Responsible Research and Innovation (RRI) is a major strategy of the “Science with and  
84 for Society” work programme of the European Union’s (EU) Horizon 2020 Framework Programme  
85 for Research and Innovation (R&I) [1]. RRI aims to build capacity and develop innovative ways to  
86 connect science to society [2]. The RRI approach enables all societal members (such as researchers,  
87 citizens, policymakers, businesses and third sector organisations) to work together during the  
88 research and innovation process in order to better align research and innovation with the values,  
89 needs and expectations of the society [1,2]. The RRI framework includes public engagement, open  
90 access, gender equity, ethics and science education as the main “keys” for governance, and two  
91 further “keys”: sustainability and social justice/inclusion for general policy [3]. The idea is that by  
92 prioritising these key components of RRI, it would help make science more attractive to young  
93 people and society, and raise awareness of the meaning of responsible science [2].

94 We have focussed on the ‘gender equity’ element of the RRI because it is imperative to advance  
95 gender equality within research institutions, as well as within the design and content of R&I [1]. The  
96 issue of enhancing female participation in economic decision-making has become prominent in the  
97 national, European and international spheres, with a particular focus on the economic dimension of  
98 gender diversity [4]. In order to achieve a fair female participation within positions of power, it is  
99 recommended that women should hold half of the total seats in board rooms [5], however, a ratio  
100 between 40% and 60%, also known as a “gender balance zone” [6], is considered acceptable – a  
101 threshold that is set by the European Commission [4].

102 From the perspective of gender equity in academia and scientific research, gender parity in scientific  
103 authorship is an important measure of achievement [7]. The term gender parity refers to “the equal  
104 contribution of women and men to different dimensions of life” and it is operationalised as a  
105 “relative equality in terms of numbers and proportions of women and men” for a particular  
106 indicator” [8]. Gender (dis)parity in scientific authorship has important implications for gender  
107 equity in academic advancement [9] because scientific authorship is commonly used as a measure of  
108 academic productivity that is used for performance management, reward, and recognition [10,11].  
109 The acceleration of women’s advancement and leadership in research is one of the stated objectives  
110 of the National Institute for Health Research (NIHR) in the United Kingdom (UK) and it is imperative  
111 for the RRI in the wider European research area. Yet, there is limited research concerning gender  
112 equity in scientific authorship of translational research funded through NIHR biomedical research  
113 centres (BRCs).

114 In the UK, women currently outnumber men in medical schools [12]; however, a persistent gender  
115 disparity in scientific publications remains [11,13–24]. While the proportion of women as first and  
116 senior (last) authors of original medical research has increased over the past few decades [25],  
117 women are still significantly underrepresented as authors of research articles in medical journals,  
118 especially as first and senior (last) authors [20,21,23,26], which are considered as prestigious  
119 authorship positions [11,15]. For example, in radiology the proportion of women as first author  
120 increased from 8% in 1978 to 32% in 2013 and senior author increased from 7% in 1978 to 22% in  
121 2013 [21]. Similarly, in gastroenterology the proportion of women as first author increased from 9%  
122 in 1992 to 29% in 2012, and senior author increased from 5% in 1992 to 15% in 2012 [23].



1  
2  
3 123 The profile of gender equity in higher education and research has been raised by the introduction of  
4 124 Athena SWAN-linked funding incentives by the NIHR [27–30]. While Athena SWAN awards are useful  
5 125 markers of achievement for higher education institutions and research institutes, they alone are  
6 126 insufficient to assess and monitor the progress of NIHR BRCs towards gender equity [31]. Currently,  
7 127 the proportion of women and the rate of their achievements are not tracked routinely by the NIHR  
8 128 BRCs and little is known about how much women contribute to scientific R&I in the BRCs. It is  
9 129 important to study the acceleration of women’s advancement and leadership in translational  
10 130 research in line with the stated objectives of the NIHR within the UK and RRI within the wider  
11 131 European research area through the collection of gender-disaggregated bibliometric data and  
12 132 analysis of scientific authorship by gender.

13 133 The primary objective of this study was to assess the gender parity in six types of scientific  
14 134 authorship in biomedical research. The secondary objective was to assess whether male and female  
15 135 authors publish articles in journals with different prestige levels.

## 16 136 **METHODS**

### 17 137 *Study design*

18 138 A descriptive bibliometric study.

### 19 139 *Setting*

20 140 This study was conducted at the NIHR Oxford BRC, which is research collaboration between the  
21 141 Oxford University Hospitals NHS Foundation Trust and the University of Oxford [32]. The NIHR BRCs  
22 142 supports translational research and innovation to improve healthcare for patients [33]. During the  
23 143 study period (April 2012-March 2017), the NIHR Oxford BRC was awarded £96m to support research  
24 144 across nine research themes, five cross-cutting themes, and a range of underpinning platforms. The  
25 145 research themes included Blood, Cancer, Cardiovascular, Dementia and Cerebrovascular Disease,  
26 146 Diabetes, Functional Neuroscience and Imaging, Infection, Translational Physiology, and Vaccines.  
27 147 The crosscutting themes included Genomic Medicine, Immunity and Inflammation, Surgical  
28 148 Innovation and Evaluation, Biomedical Informatics and Technology, and Prevention and Population  
29 149 Care. The major underpinning platforms included a Biorepository, Education and Training, Public  
30 150 Engagement, and Research Governance. Staff who have all or part of their salary funded through the  
31 151 BRC award are members of the NIHR faculty. During the study period (April 2012- and March 2017),  
32 152 there were 74% (n=1268) male and 26% (n=454) female principal investigators (scientists that have  
33 153 won research grants and are ultimately responsible for the conduct of research studies); 60%  
34 154 (n=600) male and 40% (n=404) female NIHR investigators (scientists leading and undertaking  
35 155 research, lead researchers, other senior researchers and research assistants); and 53% male (n=446)  
36 156 and 47% (396) female NIHR trainees (those engaged in research training leading to a higher degree  
37 157 by research). It is a contractual requirement to report the number of BRC supported publications  
38 158 published by researchers funded or supported by the NIHR research funds on an annual basis.  
39 159 Additionally, the NIHR uses bibliometric analyses to inform eligibility for its funding [34,35]. This  
40 160 study was carried out as part of a wider programme of research on the markers of achievement for  
41 161 assessing and monitoring gender equity in translational research organisations [7,31].

## 162 **Data**

163 Data comprised translational research publications published by researchers funded or supported by  
164 the NIHR Oxford BRC. The eligibility criteria for inclusion of a publication were: funding or support by  
165 the NIHR Oxford BRC and publication or acceptance between April 2012 and March 2017. Based on  
166 these criteria, 2409 publications were identified. These publications were classified as: basic science  
167 studies, clinical studies (both trial and non-trial studies), and other studies (comments, editorials,  
168 systematic reviews, reviews, opinions, meeting reports, guidelines and protocols).

## 169 **Main outcome measures**

170 The main outcome measures were: (1) Gender of authors, defined as a binary variable comprising,  
171 either male or female categories, (2) Six categories of scientific authorship: first author, joint first  
172 authors, first corresponding author, joint corresponding authors, last author and joint last authors  
173 (Figure 1). These categories are conventionally associated with the highest amount of contribution,  
174 credit and prestige [11,15].

175 <Insert> **Figure 1** Publication analysis workflow. <Here>

176 First author was defined as the first-named author of the publication. Publications that consisted of  
177 single authors were categorised as first authors. We considered the first author to be the main  
178 intellectual contributor in the publication, in terms of study design, data collection and analysis, and  
179 manuscript writing. Joint first authors were defined as two or more authors who were named as  
180 equal contributors and mentioned as joint first authors of the publication. The first corresponding  
181 author was defined as the only author who was reported as a corresponding author in the  
182 publication and his/her contact details such as an institutional address and/or an email address were  
183 provided for correspondence in the publication. Joint corresponding authors were defined as two or  
184 more authors who were listed or marked as corresponding authors and their contact details were  
185 provided for correspondence in the publication. Last author was defined as the last-named author of  
186 a publication. The last author was considered to be a group leader or principal investigator who may  
187 have provided significant intellectual contribution or supervision of the research work as well as  
188 acquisition of research funding [15,36]. Joint last authors were defined as two or more authors who  
189 were named as equal contributors in the publication and their names were mentioned as joint last  
190 authors in the publication. A major confounding factor, for which we could not control, was the  
191 informal nature of the conventions for the sequence and role of authors [36]. Although conventions  
192 for scientific authorship are well established in biomedical sciences [37,38], they may vary between  
193 different research areas and even between different research groups within the same area.

## 194 **Determination of gender of authors**

195 The gender of the authors was defined as a binary variable comprising either male or female  
196 categories, which were determined based on the first name of authors in all six categories of  
197 authorship. When the first names of authors were initialled in the publication or were difficult to  
198 associate with either male or female gender, further information was sought through searching their  
199 institutional webpages and online social network sites such as the LinkedIn and ResearchGate. We  
200 also used Gender APIs (gender-api.com and genderapi.io) when it was not possible to ascertain the  
201 gender of the authors by the above-mentioned methods. In addition, we contacted five authors

1  
2  
3 202 directly via email to ascertain their gender. After completing data coding by two researchers (MJM  
4 203 and RD), to ensure the accuracy of data coding, 10% of the data were checked independently (CH).  
5 204 Consensus was achieved through discussion between the researchers on data fields that did not  
6 205 match the assigning of the gender of authors and types of authorship (Figure 1).  
7  
8

### 9 206 *Gender of authors and journal prestige*

10  
11 207 For assessing whether male and female authors publish articles in less, equal or more prestigious  
12 208 journals, we used journal impact factor as a proxy for the prestige of a journal. We extracted data on  
13 209 journal impact factors from the Journal citation report 2019; and for a few articles we used the latest  
14 210 available impact factor reported on the journal websites.  
15  
16

### 17 211 *Statistical analysis*

18  
19 212 Data were analysed using frequencies including counts and percentages. Chi-square tests were used  
20 213 for identifying statistically significant differences and associations between male and female authors  
21 214 in various categories of authorship. Cochran linear trend test was used to determine trends over  
22 215 time using a Microsoft Excel add-in tool by Slezák et al[39]. T-tests were used to determine  
23 216 differences in the mean impact factor of journals with publications by male and female authors in  
24 217 three authorship categories: first, first corresponding and last authors. The level of significance was  
25 218 set at  $p < 0.05$ . Data were analysed using the IBM SPSS Statistics for Windows, Version 25.0 (Armonk,  
26 219 NY: IBM Corp.). Visualisations were created in the Microsoft Excel and BoxPlotR – a free online tool  
27 220 [40].  
28  
29  
30

### 31 221 *Patient and public involvement statement*

32  
33 222 There was no patient or public involvement in the study design.  
34  
35

## 36 223 **RESULTS**

### 37 38 224 *Types of publication*

39  
40 225 Types of publications included clinical research studies (both trial and non-trial studies) comprised  
41 226 39% (n=939), basic science research 27% (n=643) and a third of publications (34%, n=827) included  
42 227 other types of publication, such as systematic reviews, reviews, research protocols, editorials,  
43 228 guidelines, opinions, comments, and meeting reports (Table 1).  
44  
45  
46  
47  
48  
49  
50  
51  
52  
53  
54  
55  
56  
57  
58  
59  
60

230 **Table 1.** Number and types of publication by year of acceptance

| Year (Accepted) | Types of publication<br>Count (%) |                  |                              |                   | Total Count (%)   |
|-----------------|-----------------------------------|------------------|------------------------------|-------------------|-------------------|
|                 | Basic science                     | Clinical trial   | Clinical study - Not a trial | Other*            |                   |
| 2012†           | 75 (27.6)                         | 18 (6.6)         | 90 (33.1)                    | 89 (32.7)         | 272 (100)         |
| 2013◊           | 151 (28.2)                        | 27 (5.0)         | 183 (34.2)                   | 174 (32.5)        | 535 (100)         |
| 2014◊           | 122 (22.2)                        | 29 (5.3)         | 204 (37.2)                   | 194 (35.3)        | 549 (100)         |
| 2015◊           | 137 (24.7)                        | 48 (8.7)         | 158 (28.5)                   | 211 (38.1)        | 554 (100)         |
| 2016◊           | 137 (31.8)                        | 31 (7.2)         | 120 (27.8)                   | 143 (33.2)        | 431 (100)         |
| 2017‡           | 21 (30.9)                         | 5 (7.4)          | 26 (38.2)                    | 16 (23.5)         | 68 (100)          |
| <b>Total</b>    | <b>643 (26.7)</b>                 | <b>158 (6.6)</b> | <b>781 (32.4)</b>            | <b>827 (34.3)</b> | <b>2409 (100)</b> |

231 †April-December, ◊January-December ‡January-March, \*systematic reviews, reviews, research  
232 protocols, editorials, guidelines, opinions, comments, and meeting reports

### 234 *Authorship type and Gender*

235 Table 2 presents an overview of gender of authors by types of authorship. Male authors were more  
236 likely to be first authors (59%,  $P < 0.001$ ), first corresponding authors (66%,  $P < 0.001$ ) and last  
237 authors (77%,  $P < 0.001$ ) (Table 2). In the three joint authorship categories analysed, the proportion  
238 of 'female only' authors was statistically significantly lower than 'male only' authors in two  
239 categories i.e. joint corresponding authors (29%,  $P < 0.001$ ) and joint last authors categories (10%,  $P$   
240  $< 0.001$ ) (Table 2). However, in the joint first authors category, the proportion of 'male and female' as  
241 joint first authors (57%,  $P < 0.001$ ) was statistically significantly higher than 'male only' and 'female  
242 only' joint first authors (Table 2).

243 **Table 2.** Authorship type and gender of authors

| Authorship type<br>Number of publications in the category | Gender of authors<br>Count (%) |             |                 | Significance<br>$P$ -value |
|-----------------------------------------------------------|--------------------------------|-------------|-----------------|----------------------------|
|                                                           | Male only                      | Female only | Male and female |                            |
| First author (n=2409)                                     | 1413 (58.7)                    | 994 (41.3)  | N/A*            | <0.001                     |
| First corresponding author (n=2409)                       | 1565 (65.0)                    | 806 (33.5)  | N/A             | <0.001                     |
| Last author (n=2409)                                      | 1853 (76.9)                    | 553 (23.0)  | N/A             | <0.001                     |
| Joint first authors (n=458)                               | 127 (27.7)                     | 69 (15.1)   | 262 (57.2)      | <0.001                     |
| Joint corresponding authors (n=169)                       | 107 (63.3)                     | 49 (29.0)   | 13 (7.7)        | <0.001                     |
| Joint last authors (n=229)                                | 108 (47.2)                     | 23 (10.0)   | 98 (42.8)       | <0.001                     |

50 \*N/A= not applicable.

### 244 *Gender of authors by types of publication*

245 Table 3 shows gender of authors by types of publication (i.e. basic science, clinical trials, non-trial  
246 clinical studies and other research). The proportions of 'male only' authors were statistically  
247 significantly higher than the proportions of 'female only' authors in three authorship categories: first  
248 authors ( $P=0.035$ ), first corresponding authors ( $P < 0.001$ ) and last authors ( $P=0.016$ ) (Table 3). There

249 were no significant differences between the proportions of 'male only' and 'female only' authors in  
 250 all three joint authorship categories: joint first authors ( $P=0.476$ ), joint corresponding authors  
 251 ( $P=0.172$ ) and joint last authors ( $P=0.208$ ). Only the statistically significant associations are shown in  
 252 Table 3.

253 **Table 3.** Gender of authors by publication type

| Type of research                             | Publication Type<br>Count (%) |                |                              |            | Significance<br>P-value |
|----------------------------------------------|-------------------------------|----------------|------------------------------|------------|-------------------------|
|                                              | Basic science                 | Clinical trial | Clinical study - Not a trial | Other      |                         |
| <b>First author† (n=2407)</b>                |                               |                |                              |            | <b>0.035</b>            |
| Male                                         | 371 (57.8)                    | 92 (58.6)      | 433 (55.4)                   | 517 (62.6) |                         |
| Female                                       | 271 (42.2)                    | 65 (41.4)      | 348 (44.6)                   | 310 (37.5) |                         |
| <b>First corresponding author†† (n=2371)</b> |                               |                |                              |            | <b>&lt;0.001</b>        |
| Male                                         | 446 (69.4)                    | 100 (63.3)     | 465 (59.5)                   | 554 (67.0) |                         |
| Female                                       | 191 (29.7)                    | 56 (35.4)      | 307 (39.3)                   | 252 (30.5) |                         |
| <b>Last author (n=2406)</b>                  |                               |                |                              |            | <b>0.016</b>            |
| Male                                         | 503 (78.3)                    | 125 (79.6)     | 570 (73.1)                   | 655 (79.2) |                         |
| Female                                       | 139 (21.7)                    | 32 (20.4)      | 210 (26.9)                   | 172 (20.8) |                         |

### 254 **Yearly trends in Authorship by gender**

255 Figure 2 presents the yearly trends in scientific authorship by gender. In all authorship types and  
 256 across all five years of publication, the proportions of male and female authors varied (Figure 2).  
 257 Women were significantly underrepresented across all years (April 2012 - March 2017) and  
 258 authorship types. Interestingly, joint first authorship indicated a higher proportion of 'male and  
 259 female' authors compared to 'male only' and 'female only' authors (Figure 2). a to show whether  
 260 there was any. The results of Cochran linear trend test revealed no significant change over time for  
 261 all six authorship types over the years of publications.

262 <Insert> **Figure 2** Yearly trends in scientific authorship by gender (male and female), April 2012 -  
 263 March 2017. <here>

### 264 **Association between same gender across authorship categories**

265 There was a statistically significant association ( $P < 0.001$ ) between the same gender i.e. male gender  
 266 in first author and first corresponding author categories and female gender in first author and joint  
 267 first authors categories[Table 4(a)].

268 Furthermore, there were statistically significant associations ( $P < 0.001$ ) between the same gender in  
 269 the last author category with the same gender of first author, first corresponding author, Joint  
 270 corresponding author and joint last author categories [Table 4(b)].

271 However, there was no statistically significant association between the male and female last authors  
 272 with the respective gender of joint first authors ( $P=0.117$ ). Only the statistically significant  
 273 associations are shown in Tables 4(a) and 4(b).

274

275 **Table 4 (a).** Association between same genders across authorship categories

|                                            | First author<br>Count (%) |            | Significance     |
|--------------------------------------------|---------------------------|------------|------------------|
|                                            | Male                      | Female     | P-value          |
| <b>First corresponding author (n=2371)</b> |                           |            | <b>&lt;0.001</b> |
| <i>Male</i>                                | 1236 (79)                 | 329 (21)   |                  |
| <i>Female</i>                              | 158 (19.6)                | 648 (80.4) |                  |
| <b>First joint authors (n=457)</b>         |                           |            | <b>&lt;0.001</b> |
| <i>Male only</i>                           | 124 (97.6)                | 3 (2.4)    |                  |
| <i>Female only</i>                         | 10 (14.5)                 | 59 (85.5)  |                  |
| <i>both male and female</i>                | 140 (53.6)                | 121 (46.4) |                  |

276 **Table 4 (b).** Association between same genders across authorship categories

| Authorship type                            | Last author<br>Count (%) |            | Significance     |
|--------------------------------------------|--------------------------|------------|------------------|
|                                            | Male                     | Female     | P-value          |
| <b>First author† (n=2406)</b>              |                          |            | <b>&lt;0.001</b> |
| <i>Male</i>                                | 1146 (61.8)              | 267 (48.3) |                  |
| <i>Female</i>                              | 707 (38.2)               | 286 (51.7) |                  |
| <b>First corresponding author (n=2370)</b> |                          |            | <b>&lt;0.001</b> |
| <i>Male</i>                                | 1429 (78.4)              | 136 (24.7) |                  |
| <i>Female</i>                              | 394 (21.6)               | 412 (75.3) |                  |
| <b>Joint corresponding authors(n=168)</b>  |                          |            | <b>&lt;0.001</b> |
| <i>Male only</i>                           | 104 (84.5)               | 3 (6.7)    |                  |
| <i>Female only</i>                         | 13 (10.6)                | 36 (80)    |                  |
| <i>Both male and female</i>                | 6 (4.9)                  | 6 (13.3)   |                  |
| <b>Joint last authors (n=229)</b>          |                          |            | <b>&lt;0.001</b> |
| <i>Male only</i>                           | 106 (63.9)               | 2 (8.2)    |                  |
| <i>Female only</i>                         | 2 (1.2)                  | 21 (33.3)  |                  |
| <i>Both male and female</i>                | 58 (34.9)                | 40 (63.5)  |                  |

277 ***Gender of authors and journal prestige***

278 Of 2388 journal articles, 96.6% (n=2307) were published in journals having an impact factor (mean =  
 279 9.58 ( $\pm 12.16$ ), median = 5.36, minimum = 0.39, maximum = 74.7) while only 3.4% (n=81) articles  
 280 were published in journals having no impact factor. There was no statistically significant difference in  
 281 the mean journal impact factor (JIF) by gender of first and last authors; however, the mean JIF was  
 282 statistically significantly higher for male first corresponding authors compared to female first  
 283 corresponding authors (Table 5, Figure 3).

284

285

286 **Table 5.** Journal impact factor and authorship categories by gender

|                                   | Mean  | Standard deviation | 95% CI      | P- Value     |
|-----------------------------------|-------|--------------------|-------------|--------------|
| <b>First author</b>               |       |                    |             | 0.171        |
| Male                              | 9.88  | 12.46              | 9.18, 10.58 |              |
| Female                            | 9.14  | 11.73              | 8.37, 9.92  |              |
| <b>First corresponding author</b> |       |                    |             | <b>0.020</b> |
| Male                              | 10.00 | 12.72              | 9.34, 10.67 |              |
| Female                            | 8.77  | 10.95              | 7.97, 9.57  |              |
| <b>Last author</b>                |       |                    |             |              |
| Male                              | 9.34  | 11.76              | 8.77, 9.91  | 0.115        |
| Female                            | 10.40 | 13.38              | 9.21, 11.59 |              |

287 <Insert> **Figure 3** Impact factor of journals and authorship categories by gender. <Here>

288

## 289 DISCUSSION

290 We studied gender parity in the authorship of translational research publications (n=2409) produced  
 291 by researchers affiliated with the NIHR Oxford BRC, which is one of the biggest amongst 20 NIHR  
 292 BRCS in the UK. We determined gender of authors in six different categories of authorship that  
 293 included three types of joint authorships in biomedical research, which is the most unique feature of  
 294 this study and to our best knowledge it has been done for the first time in this study.

295 In the first author category, we found proportions of female authors and male authors within the  
 296 40%-60% "gender balance zone" [6]. In the last (senior) author category, the observed proportion of  
 297 female last authors (77%) was lower than male last authors (23%) but it was higher than reported in  
 298 other studies [12,14,25]. In the context of biomedical research in the UK, principal investigators (PIs)  
 299 are typically last authors [41]. In the current study setting i.e. NIHR Oxford BRC, the proportion of  
 300 male PIs was 74% and the remaining 26% PIs were female during the period of analysis. Thus, it  
 301 appears that the representation of male and female last authors was proportionate to their  
 302 respective proportions as PIs in the BRC. These findings suggest positive trends and the NHIR Oxford  
 303 BRC doing very well in gender parity in the senior (last) authorship category.

304 This study extends understanding of gender-based trends in scientific authorship (Figure 2) by  
 305 showing encouraging incremental changes in gender parity in authorship in a biomedical research  
 306 setting. Previous research examined the gender gap in authorship within the medical literature  
 307 reporting an upward trend for female first authors from 6% in 1970 to 29% in 2004 and female last  
 308 authors from 4% in 1970 to 19% 2004. However, it was limited to US based institutions [13]. A  
 309 similar UK based study covering the same period (i.e. 1970-2004) also showed upward trends for  
 310 female first authors increasing from 11% in 1970 to 37% in 2004 and female last authors from 12% in  
 311 1970 to 17% in 2004 [25]. In addition, a recent study by Filardo et al. [14] examined the prevalence  
 312 of female first authorship of original research published in six high impact general medical journals

1  
2  
3 313 between February 1994 and June 2014 revealed that the adjusted probability of an article having a  
4 314 female first authorship increased significantly from 27% in 1994 to 37% in 2014 [14]. However,  
5 315 despite the proportion of female first authors varied greatly by journal, men were generally more  
6 316 likely to be first authors than women [14]. Compared to previous studies mentioned above, our  
7 317 study provides evidence of higher and increasing gender equity in the first authors, last authors and  
8 318 other four categories of scientific authorship in biomedical research (Table 2).

11 319 We found a strong association between same gender and authorship types showing if the first  
12 320 author of a publication was male, it was highly likely that the first corresponding author of the same  
13 321 publication would also be male. Similarly, the likelihood of the first author being female was higher,  
14 322 if the first corresponding author was also female [42]. Likewise, there appeared to be a significant  
15 323 association of male and female last authors with the respective gender of first authors. Previous  
16 324 research has highlighted males and females were more likely to be first authors on papers if the last  
17 325 authors were of the same gender [21,43–45]; however, these were not conducted in a translational  
18 326 research setting. Our findings also revealed a strong association of male and female last authors  
19 327 with the respective gender of corresponding authors [45].

24 328 However, due to the differences in gender equity between different research areas and medical  
25 329 specialties, where a centre-specific mix of research themes is likely to influence gender equity in  
26 330 scientific authorship, it is difficult to make direct comparisons across the literature.

29 331 In regards to gender parity in authorship scientific publications, which is an important marker of  
30 332 achievement for gender equity [7], our study builds an important evidence base in biomedical  
31 333 research settings and our results support previous studies [13,25,46–48].

33 334 We found that male first corresponding authors were more likely to publish articles in high impact  
34 335 factor journals compared to female first corresponding authors (Table 5). The practice of  
35 336 corresponding author varies between institutions, academic disciplines and countries [49] but  
36 337 usually the first corresponding author is either a researcher who has done major research work or a  
37 338 senior investigator who is overall responsible for the research study/project [15,36,50]. We do not  
38 339 have sufficient information to ascertain whether male first corresponding authors in our study were  
39 340 investigators or junior researchers or doctoral candidates. However, our findings suggest that female  
40 341 first corresponding authors are less likely to publish articles in high impact journals.

44 342 More importantly, our study shows that both the male and the female biomedical researchers  
45 343 publish articles at prestigious authorship positions i.e. first and last authors in journals with high  
46 344 impact factors (Figure 3) and no statistical association between the gender of first and last authors  
47 345 and the journal impact factor were identified [51]. In contrast, Bendels et al reported that female  
48 346 researchers were less likely to publish in high impact factor journals at prestigious authorship  
49 347 positions [46]. This could be due to the differences in journals analysed, research disciplines included  
50 348 and the time period covered. Our analysis included a wide range of journals in which researchers  
51 349 affiliated with the NIHR Oxford BRC published translational research from April 2012 to March 2017  
52 350 while Bendels et al analysed only the Nature Index journals in four disciplines i.e. Life Science,  
53 351 Multidisciplinary, Earth and Environmental and Chemistry covering publication period from January  
54 352 2008 to May 2016 [46].



### 353 ***Implications for policy and practice***

354 While NIHR BRCs routinely collect bibliometric data on publications arising from the NIHR-funded  
355 research, and report to the NIHR (the funder), to the best of our knowledge, this data is not  
356 routinely analysed by gender. Our study provides the feasibility of using NIHR BRCs funded or  
357 supported research publications for analysing scientific authorship by gender. While retrospective  
358 analysis of the gender of authors in scientific publications is labour-intensive and has limitations,  
359 there is an opportunity to begin to track this prospectively. As more data becomes available, this  
360 would enable longitudinal analysis of gender in scientific authorship, which could be useful for  
361 tracking progress towards gender equity and related issues such as markers of achievement across  
362 all NIHR BRCs [7].

363 In addition, since the acceleration of women's advancement and leadership in translational research  
364 is one of the stated objectives of the NIHR, investigating the extent of gender equity in scientific  
365 authorship may usefully inform strategies to accelerate women's advancement and leadership in  
366 NIHR-funded research. Moreover, bibliometric analyses used by the NIHR to inform competition for  
367 NIHR funding may incorporate the gender dimension into the analysis, which could provide  
368 additional information on the competitiveness for NIHR funding [52,53].

### 369 **CONCLUSION**

370 Although, the proportions of female authors is significantly lower than the proportions of male  
371 authors in all six categories of authorship included in our analysis, first authorship is within the 40%-  
372 60% gender balance zone and the proportion of male and female last authors is proportionate to  
373 their respective proportions as principal investigators in the NIHR Oxford BRC This may suggest a  
374 positive trend in gender parity in the senior (last) author category in scientific publications produced  
375 by the BRC during April 2012-March 2017. . This study provides evidence that both male and female  
376 authors at first and last authorship positions publish articles in journals with almost equal impact  
377 factor; however, male first corresponding authors are more likely to publish articles in prestigious  
378 journals with high impact factor. We also conclude that it is feasible to analyse bibliometric data on  
379 publications arising from NIHR funding by gender and consider establishing processes for monitoring  
380 gender equity in scientific authorship as an important marker of achievement in the context of NIHR  
381 BRCs [7].

### 382 **Contributors**

383 LDE conceived the study. RD and MJM coded the data. SGSS analysed the data and created  
384 visualisations. RD and SGSS drafted the manuscript. PVO contributed to the conception of the study.  
385 PVO and LH co-wrote parts of the manuscript. CRH and OC participated in data collection. VK, LRH,  
386 and AMB contributed to the conception of the study, facilitated access to the publications and  
387 coordinated the study. All authors read, contributed to and approved the final manuscript.

### 388 **Funding**

389 This study is funded by the European Union's Horizon 2020 research and innovation programme  
390 award STARBIOS2 under grant agreement No. 709517 and by the National Institute for Health

391 Research (NIHR) Oxford Biomedical Research Centre, grant BRC-1215-20008 to the Oxford University  
392 Hospitals NHS Foundation Trust and the University of Oxford. The views expressed are those of the  
393 authors and not necessarily those of the NHS, the NIHR, or the Department of Health and Social  
394 Care.

## 395 **Competing interests**

396 VK is Chief Operating Officer and LRH is Clinical Research Manager at the National Institute for  
397 Health Research (NIHR) Biomedical Research Centre, Oxford. AMB is a senior medical science advisor  
398 and co-founder of Brainomix, a company that develops electronic ASPECTS (e-ASPECTS), an  
399 automated method to evaluate ASPECTS in stroke patients. MJM, LDE and PVO were funded by  
400 STARBIOS2 and the National Institute for Health Research (NIHR) Oxford Biomedical Research Centre  
401 (BRC). PVO is a member of the NIHR Advisory Group on Equality, Diversity, and Inclusion, a member  
402 of the European Association of Science Editors Gender Policy Committee, and a member of the  
403 Athena SWAN Self-Assessment Team of the Radcliffe Department of Medicine, University of Oxford.  
404 The other authors declare no competing interests.

## 405 **Ethics**

406 The University of Oxford Clinical Trials and Research Governance Team reviewed the study and  
407 deemed it exempt from full ethics review on the grounds that it falls outside of the Governance  
408 Arrangements for Research Ethics Committees (GAfREC), which stipulate which publications are  
409 required to have ethics review. A wider programme of research on the activities of the NIHR Oxford  
410 Biomedical Research Centre from 2017 to 2022 received ethics clearance through the University of  
411 Oxford Central University Research Ethics Committee (R51801/ RE001), the Health Research  
412 Authority (IRAS ID 228049) and the Oxford University Hospitals NHS Foundation Trust Management  
413 (PID 12779).

## 414 **Acknowledgements**

415 The authors wish to thank the editors and reviewers who provided constructive feedback and  
416 suggestions which improved this work. The authors also wish to thank Professor Helen McShane for  
417 reviewing the initial draft manuscript and making comments and suggestions for improving it.

## 418 **Patient consent for publication**

419 Not required.

## 420 **Data sharing statement**

421 No additional data available.

## 422 **REFERENCES**

423 1 Colizzi V, Mezzana D, Ovseiko P V., *et al*. Structural transformation to attain responsible  
424 BIOSciences (STARBIOS2): Protocol for a horizon 2020 funded European multicenter project to

- 1  
2  
3 425 promote responsible research and innovation. *Journal of Medical Internet Research* 2019;**21**.  
4 426 doi:10.2196/11745  
5  
6 427 2 Elster D, Barendziak T, Birkholz J. Towards a Sustainable and Open Science: Recommendations  
7 428 for Enhancing Responsible Research and Innovation in the Biosciences at the University of  
8 429 Bremen. 2019.  
9  
10 430 3 European Commission. Indicators for promoting and monitoring Responsible Research and  
11 431 Innovation. Report from the Expert Group on Policy Indicators for Responsible Research and  
12 432 Innovation. 2015.  
13 433 [http://ec.europa.eu/research/swafs/pdf/pub\\_rri/rri\\_indicators\\_final\\_version.pdf](http://ec.europa.eu/research/swafs/pdf/pub_rri/rri_indicators_final_version.pdf) (accessed 19  
14 434 Feb 2020).  
15  
16  
17 435 4 European Commission. DIRECTIVE OF THE EUROPEAN PARLIAMENT AND OF THE COUNCIL on  
18 436 improving the gender balance among non-executive directors of companies listed on stock  
19 437 exchanges and related measures. 2012. [https://eur-lex.europa.eu/legal-](https://eur-lex.europa.eu/legal-content/EN/TXT/?uri=CELEX:52012PC0614)  
20 438 [content/EN/TXT/?uri=CELEX:52012PC0614](https://eur-lex.europa.eu/legal-content/EN/TXT/?uri=CELEX:52012PC0614) (accessed 19 Feb 2020).  
21  
22  
23 439 5 European Commission. Report on Equality between Women and Men in the European Union.  
24 440 2019;:1–78. doi:10.2838/776419.  
25 441 [https://ec.europa.eu/info/sites/info/files/aid\\_development\\_cooperation\\_fundamental\\_rights/a](https://ec.europa.eu/info/sites/info/files/aid_development_cooperation_fundamental_rights/annual_report_ge_2019_en.pdf)  
26 442 [nnual\\_report\\_ge\\_2019\\_en.pdf](https://ec.europa.eu/info/sites/info/files/aid_development_cooperation_fundamental_rights/annual_report_ge_2019_en.pdf) (accessed 19 Feb 2020).  
27  
28 443 6 Kuhlmann E, Ovseiko P V., Kurmeyer C, *et al.* Closing the gender leadership gap: A multi-centre  
29 444 cross-country comparison of women in management and leadership in academic health centres  
30 445 in the European Union. *Human Resources for Health* 2017;**15**:1–7. doi:10.1186/s12960-016-  
31 446 0175-y  
32  
33  
34 447 7 Henderson LR, Shah SGS, Ovseiko PV, *et al.* Markers of achievement for assessing and  
35 448 monitoring gender equity in a UK National Institute for Health Research Biomedical Research  
36 449 Centre: A two-factor model. *PLOS ONE* 2020;**15**:e0239589. doi:10.1371/journal.pone.0239589  
37  
38 450 8 European Institute for Gender Equality. Gender parity.  
39 451 2020.<https://eige.europa.eu/thesaurus/terms/1195> (accessed 19 Feb 2020).  
40  
41 452 9 Rexrode KM. The gender gap in first authorship of research papers. *The BMJ* 2016;**1130**:1–2.  
42 453 doi:10.1136/bmj.i1130  
43  
44 454 10 Bloch C, Graversen EK, Pedersen HS. Competitive Research Grants and Their Impact on Career  
45 455 Performance. *Minerva* 2014;**52**:77–96.  
46  
47 456 11 Bendels, M, Muller, R, Brueggmann, D, Groneberg D. Gender disparities in high-quality research  
48 457 revealed by Nature Index journals. *PLoS ONE* 2018;**13**:1–21.  
49  
50 458 12 Jefferson L, Bloor K, Maynard A. Women in medicine: Historical perspectives and recent trends.  
51 459 *British Medical Bulletin* 2015;**114**:5–15. doi:10.1093/bmb/ldv007  
52  
53 460 13 Jagsi, R, Guancial, E, Worobey, C, Henault, L, Chang, Y, Starr, R, Tarbell, N, Hylek E. The “Gender  
54 461 Gap” in Authorship of Academic Medical Literature — A 35-Year Perspective. *The New England*  
55 462 *Journal of Medicine* 2006;**355**:281–7.  
56  
57  
58  
59  
60

- 1  
2  
3 463 14 Filardo G, Graca B, Sass DM, *et al.* Trends and comparison of female first authorship in high  
4 464 impact medical journals : observational study (1994-2014 ). *The BMJ* 2016;**352**:1–8.  
5 465 doi:10.1136/bmj.i847  
6  
7 466 15 Bendels MHK, Wanke E, Schoffel N, Bauer J, Quarcoo D, Groneberg DA. Gender equality in  
8 467 academic research on epilepsy — a study on scientific authorships. *Epilepsia* 2017;**58**:1794–802.  
9 468 doi:10.1111/epi.13873  
10  
11 469 16 Bendels MHK, Brüggmann D, Schöffel N, *et al.* Gendermetrics of cancer research : results from a  
12 470 global analysis on lung cancer. *Oncotarget* 2017;:1–11.  
13  
14 471 17 Bendels MHK, Dietz MC, Brüggmann D, *et al.* Gender disparities in high-quality dermatology  
15 472 research : a descriptive bibliometric study on scientific authorships. *BMJ Open* 2018;**8**:1–11.  
16 473 doi:10.1136/bmjopen-2017-020089  
17  
18 474 18 Bendels MHK, Brüggmann D, Schöffel N, *et al.* Gendermetrics of cancer research: Results from  
19 475 a global analysis on prostate cancer. *Oncotarget* 2018;**9**:19640–9.  
20 476 doi:10.18632/oncotarget.24716  
21  
22 477 19 Sing DC, Jain D, Ouyang D. Gender trends in authorship of spine-related academic literature — a  
23 478 39-year perspective. *The Spine Journal* 2017;**17**:1749–54. doi:10.1016/j.spinee.2017.06.041  
24  
25 479 20 Schisterman EF, Swanson CW, Lu Y, *et al.* The changing face of epidemiology: gender disparities  
26 480 in citations? *Epidemiology* 2017;**28**:159–68. doi:10.1097/EDE.0000000000000593.The  
27  
28 481 21 Piper CL, Scheel JR, Lee CI, *et al.* Gender trends in radiology authorship: A 35-year analysis.  
29 482 *American Journal of Roentgenology* 2016;**206**:3–7. doi:10.2214/AJR.15.15116  
30  
31 483 22 Mueller CM, Gaudilliere DK, Kin C, *et al.* Gender disparities in scholarly productivity of US  
32 484 academic surgeons. *Journal of Surgical Research* 2016;**203**:28–33. doi:10.1016/j.jss.2016.03.060  
33  
34 485 23 Long MT, Leszczynski A, Thompson KD, *et al.* Female authorship in major academic  
35 486 gastroenterology journals: A look over 20 years. *Gastrointestinal Endoscopy* 2015;**81**:1440-  
36 487 1447.e3. doi:10.1016/j.gie.2015.01.032  
37  
38 488 24 Fishman M, Williams WA, Goodman DM, *et al.* Gender Differences in the Authorship of Original  
39 489 Research in Pediatric Journals, 2001-2016. *Journal of Pediatrics* 2017;**191**:244-249.e1.  
40 490 doi:10.1016/j.jpeds.2017.08.044  
41  
42 491 25 Sidhu R, Rajashekhar P, Lavin VL, *et al.* The gender imbalance in academic medicine: A study of  
43 492 female authorship in the United Kingdom. *Journal of the Royal Society of Medicine*  
44 493 2009;**102**:337–42. doi:10.1258/jrsm.2009.080378  
45  
46 494 26 Sing DC, Jain D, Ouyang D. Gender trends in authorship of spine-related academic literature—a  
47 495 39-year perspective. *Spine Journal* 2017;**17**:1749–54. doi:10.1016/j.spinee.2017.06.041  
48  
49 496 27 Ovseiko P V., Chapple A, Edmunds LD, *et al.* Advancing gender equality through the Athena  
50 497 SWAN Charter for Women in Science: An exploratory study of women’s and men’s perceptions.  
51 498 *Health Research Policy and Systems* 2017;**15**:1–13. doi:10.1186/s12961-017-0177-9  
52  
53 499 28 Ovseiko P V., Pololi LH, Edmunds LD, *et al.* Creating a more supportive and inclusive university  
54 500 culture: a mixed-methods interdisciplinary comparative analysis of medical and social sciences

- 1  
2  
3 501 at the University of Oxford. *Interdisciplinary Science Reviews* 2019;**44**:166–91.  
4 502 doi:10.1080/03080188.2019.1603880  
5  
6 503 29 Schmidt EK, Ovseiko P V, Henderson LR, *et al.* Understanding the Athena SWAN award scheme  
7 504 for gender equality as a complex social intervention in a complex system: analysis of Silver  
8 505 award action plans in a comparative European perspective. *bioRxiv* 2019;:555482.  
9 506 doi:10.1101/555482  
10  
11 507 30 Ovseiko PV, Taylor M, Gilligan RE, *et al.* Effect of Athena SWAN funding incentives on women's  
12 508 research leadership. *BMJ* 2020;**371**:m3975. doi:10.1136/bmj.m3975  
13  
14 509 31 Ovseiko, PV, Edmunds, LD, Pololi, LH *et al.* Markers of achievement for assessing and  
15 510 monitoring gender equity in translational research organisations : a rationale and study  
16 511 protocol. *BMJ Open* 2016;**6**:1–11. doi:10.1136/bmjopen-2015-009022  
17  
18 512 32 NIHR Oxford BRC. About the NIHR Oxford Biomedical Research Centre.  
19 513 2019.<https://oxfordbrc.nihr.ac.uk/about-us-intro/> (accessed 19 Dec 2019).  
20  
21 514 33 Greenhalgh T, Ovseiko P V., Fahy N, *et al.* Maximising value from a United Kingdom Biomedical  
22 515 Research Centre: study protocol. *Health research policy and systems* 2017;**15**:70.  
23 516 doi:10.1186/s12961-017-0237-1  
24  
25 517 34 Gunashekar S, Parks S, Calero-Medina C, *et al.* Bibliometric analysis of highly cited publications  
26 518 of biomedical and health research in England, 2004--2013. *Bibliometric analysis of highly cited*  
27 519 *publications of biomedical and health research in England, 2004--2013* 2016;:83.  
28 520 doi:<https://doi.org/10.7249/RR1363>  
29  
30 521 35 Gunashekar S, Wooding S, Guthrie S. How do NIHR peer review panels use bibliometric  
31 522 information to support their decisions? *Scientometrics* 2017;**112**:1813–35. doi:10.1007/s11192-  
32 523 017-2417-8  
33  
34 524 36 Tschardt T, Hochberg ME, Rand TA, *et al.* Author sequence and credit for contributions in  
35 525 multiauthored publications. *PLoS Biology* 2007;**5**:0013–4. doi:10.1371/journal.pbio.0050018  
36  
37 526 37 Wren JD, Kozak KZ, Johnson KR, *et al.* The write position. A survey of perceived contributions to  
38 527 papers based on byline position and number of authors. *EMBO Reports* 2007;**8**:988–91.  
39 528 doi:10.1038/sj.embor.7401095  
40  
41 529 38 ICMJE. Defining the Role of Authors and Contributors.  
42 530 2019.[http://www.icmje.org/recommendations/browse/roles-and-responsibilities/defining-the-](http://www.icmje.org/recommendations/browse/roles-and-responsibilities/defining-the-role-of-authors-and-contributors.html)  
43 531 [role-of-authors-and-contributors.html](http://www.icmje.org/recommendations/browse/roles-and-responsibilities/defining-the-role-of-authors-and-contributors.html) (accessed 23 Dec 2019).  
44  
45 532 39 Slezák P, Bokes P, Námer P, *et al.* Microsoft Excel add-in for the statistical analysis of  
46 533 contingency tables. *Int J Innovation Educ Res* 2014;**2**:90–100. doi:10.31686/ijer.vol2.iss5.188  
47  
48 534 40 Spitzer M, Wildenhain J, Rappsilber J, *et al.* BoxPlotR: a web tool for generation of box plots. *Nat*  
49 535 *Methods* 2014;**11**:121–2. doi:10.1038/nmeth.2811  
50  
51 536 41 Patel VM, Panzarasa P, Ashrafian H, *et al.* Collaborative patterns, authorship practices and  
52 537 scientific success in biomedical research: a network analysis. *J R Soc Med* 2019;**112**:245–57.  
53 538 doi:10.1177/0141076819851666  
54  
55  
56  
57  
58  
59  
60

- 1  
2  
3 539 42 Ouyang, D, Harrington, RA., Rodriguez F. Association Between Female Corresponding Authors  
4 540 and Female Co-Authors in Top Contemporary Cardiovascular Medicine Journals. *Circulation*  
5 541 *American Heart Association* 2019;**139**:1127–9. doi:10.1161/CIRCULATIONAHA.118.037763  
6  
7 542 43 Fox CW, Burns CS, Muncy AD, *et al.* Gender differences in patterns of authorship do not affect  
8 543 peer review outcomes at an ecology journal. *Functional Ecology* 2016;**30**:126–39.  
9 544 doi:10.1111/1365-2435.12587  
10  
11 545 44 Salerno PE, Páez-Vacas M, Guayasamin JM, *et al.* Male principal investigators (almost) don't  
12 546 publish with women in ecology and zoology. *PLoS ONE* 2019;**14**:1–14.  
13 547 doi:10.1371/journal.pone.0218598  
14  
15 548 45 Edwards HA, Schroeder J, Dugdale HL. Correction: Gender differences in authorships are not  
16 549 associated with publication bias in an evolutionary journal(PLoS ONE (2019)13:8  
17 550 (e0201725)Doi:10.1371/journal.pone.0201725). *PLoS ONE* 2019;**14**:1–16.  
18 551 doi:10.1371/journal.pone.0217251  
19  
20 552 46 Bendels MHK, Müller R, Brueggmann D, *et al.* Gender disparities in high-quality research  
21 553 revealed by nature index journals. *PLoS ONE* 2018;**13**:1–21. doi:10.1371/journal.pone.0189136  
22  
23 554 47 Feramisco JD, Leitenberger JJ, Redfern SI, *et al.* A gender gap in the dermatology literature ?  
24 555 Cross-sectional analysis of manuscript authorship trends in dermatology journals during 3  
25 556 decades. *Journal of American Dermatology* 2009;**60**:63–9. doi:10.1016/j.jaad.2008.06.044  
26  
27 557 48 Bhattacharyya N, Shapiro NL. Increased Female Authorship in Otolaryngology Over the Past  
28 558 Three Decades. *The Laryngoscope* 2000;**110**:358–61. doi:10.1097/00005537-200003000-00005  
29  
30 559 49 Duffy MA. Last and corresponding authorship practices in ecology. *Ecology and Evolution*  
31 560 2017;**7**:8876–87. doi:10.1002/ece3.3435  
32  
33 561 50 Wu C, Fuller S, Shi Z, *et al.* The gender gap in commenting: Women are less likely than men to  
34 562 comment on (men's) published research. *PLOS ONE* 2020;**15**:e0230043.  
35 563 doi:10.1371/journal.pone.0230043  
36  
37 564 51 Fox CW, Ritchey JP, Paine CET. Patterns of authorship in ecology and evolution: First, last, and  
38 565 corresponding authorship vary with gender and geography. *Ecology and Evolution*  
39 566 2018;**8**:11492–507. doi:10.1002/ece3.4584  
40  
41 567 52 Van Leeuwen T, Hoorens S, Grant J. Using bibliometrics to support the procurement of NIHR  
42 568 biomedical research centres in England. *Research Evaluation* 2009;**18**:71–82.  
43 569 doi:10.3152/095820209X414178  
44  
45 570 53 Leeuwen T Van, Grant J. Bibliometric analysis of highly cited publications of health research in  
46 571 England, 1995-2004. 2007.

572

## 573 Additional files list

574 **Figure 1** Publication analysis workflow.

575 The workflow shows the process of extracting data according to gender from six types of authorship.

1  
2  
3  
4 576 **Figure 2** Yearly trends in scientific authorship by gender (male and female), April 2012 - March 2017.  
5 577 This plot represents the yearly variation of the proportion of male and female authors according to  
6 578 six types of authorship between the years of publication/acceptance from 2012 to 2017.

8  
9 579 **Figure 3** Impact factor of journals and authorship categories by gender.  
10 580 This figure shows the boxplots of impact factors of journals in which male and female authors  
11 581 published articles.

12  
13  
14  
15  
16  
17  
18  
19  
20  
21  
22  
23  
24  
25  
26  
27  
28  
29  
30  
31  
32  
33  
34  
35  
36  
37  
38  
39  
40  
41  
42  
43  
44  
45  
46  
47  
48  
49  
50  
51  
52  
53  
54  
55  
56  
57  
58  
59  
60

For peer review only



Figure 1 Publication analysis workflow.

For peer review only

1  
2  
3  
4  
5  
6  
7  
8  
9  
10  
11  
12  
13  
14  
15  
16  
17  
18  
19  
20  
21  
22  
23  
24  
25  
26  
27  
28  
29  
30  
31  
32  
33  
34  
35  
36  
37  
38  
39  
40  
41  
42  
43  
44  
45  
46  
47  
48  
49  
50  
51  
52  
53  
54  
55  
56  
57  
58  
59  
60



1  
2  
3  
4  
5  
6  
7  
8  
9  
10  
11  
12  
13  
14  
15  
16  
17  
18  
19  
20  
21  
22  
23  
24  
25  
26  
27  
28  
29  
30  
31  
32  
33  
34  
35  
36  
37  
38  
39  
40  
41  
42  
43  
44  
45  
46  
47  
48  
49  
50  
51  
52  
53  
54  
55  
56  
57  
58  
59  
60

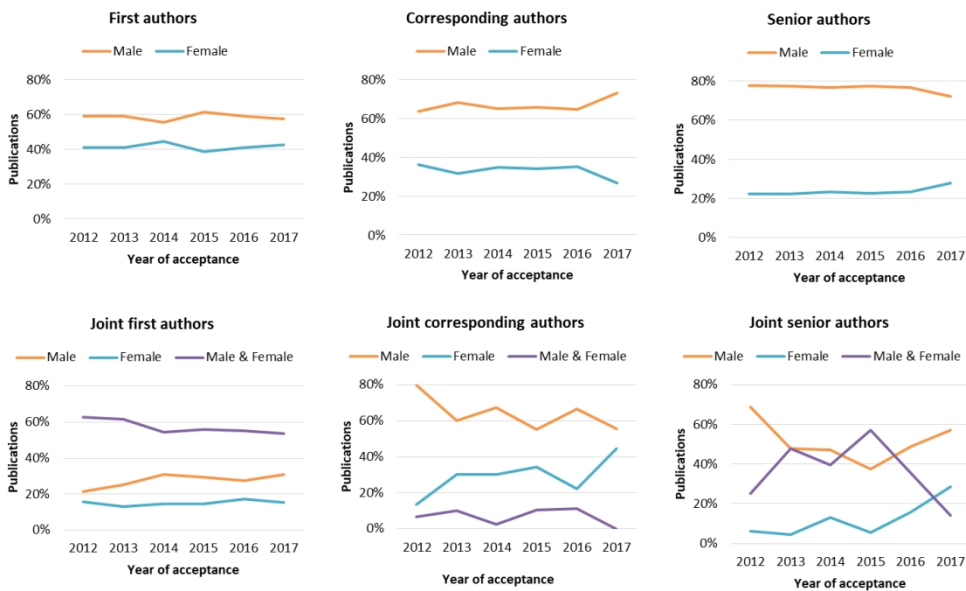

1  
2  
3  
4  
5  
6  
7  
8  
9  
10  
11  
12  
13  
14  
15  
16  
17  
18  
19  
20  
21  
22  
23  
24  
25  
26  
27  
28  
29  
30  
31  
32  
33  
34  
35  
36  
37  
38  
39  
40  
41  
42  
43  
44  
45  
46  
47  
48  
49  
50  
51  
52  
53  
54  
55  
56  
57  
58  
59  
60

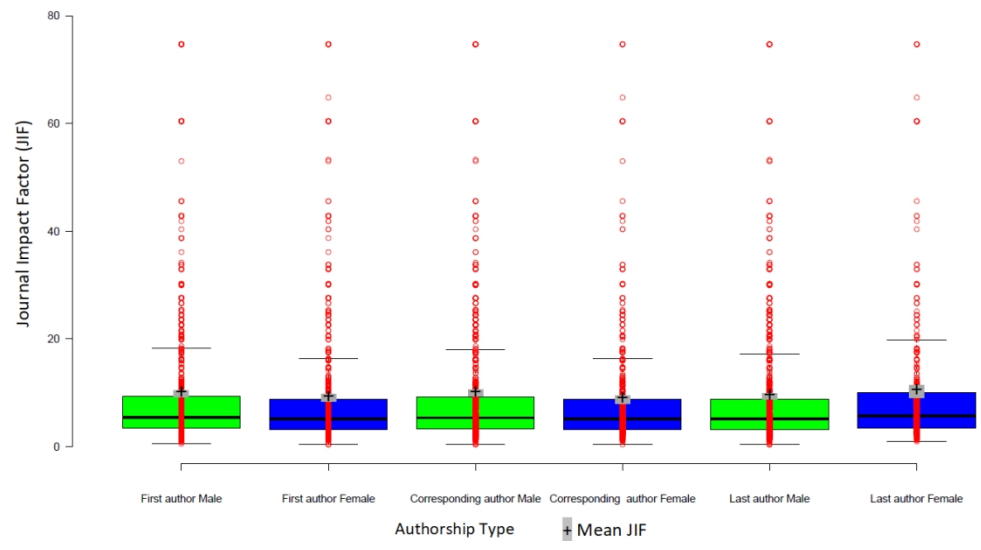

Supplement: bmjopen-2020-037935.draft_revisions.pdf [file bmjopen-2020-037935.draft_revisions.pdf]
